# Supplementary figures and images for: In vitrotransport and satiety of a beta-lactoglobulin dipeptide and beta-casomorphin-7 and its metabolites
Source: Royal Society of Chemistry journal article supplement (doi:10.1039/c4fo00164h), 2014-01-01

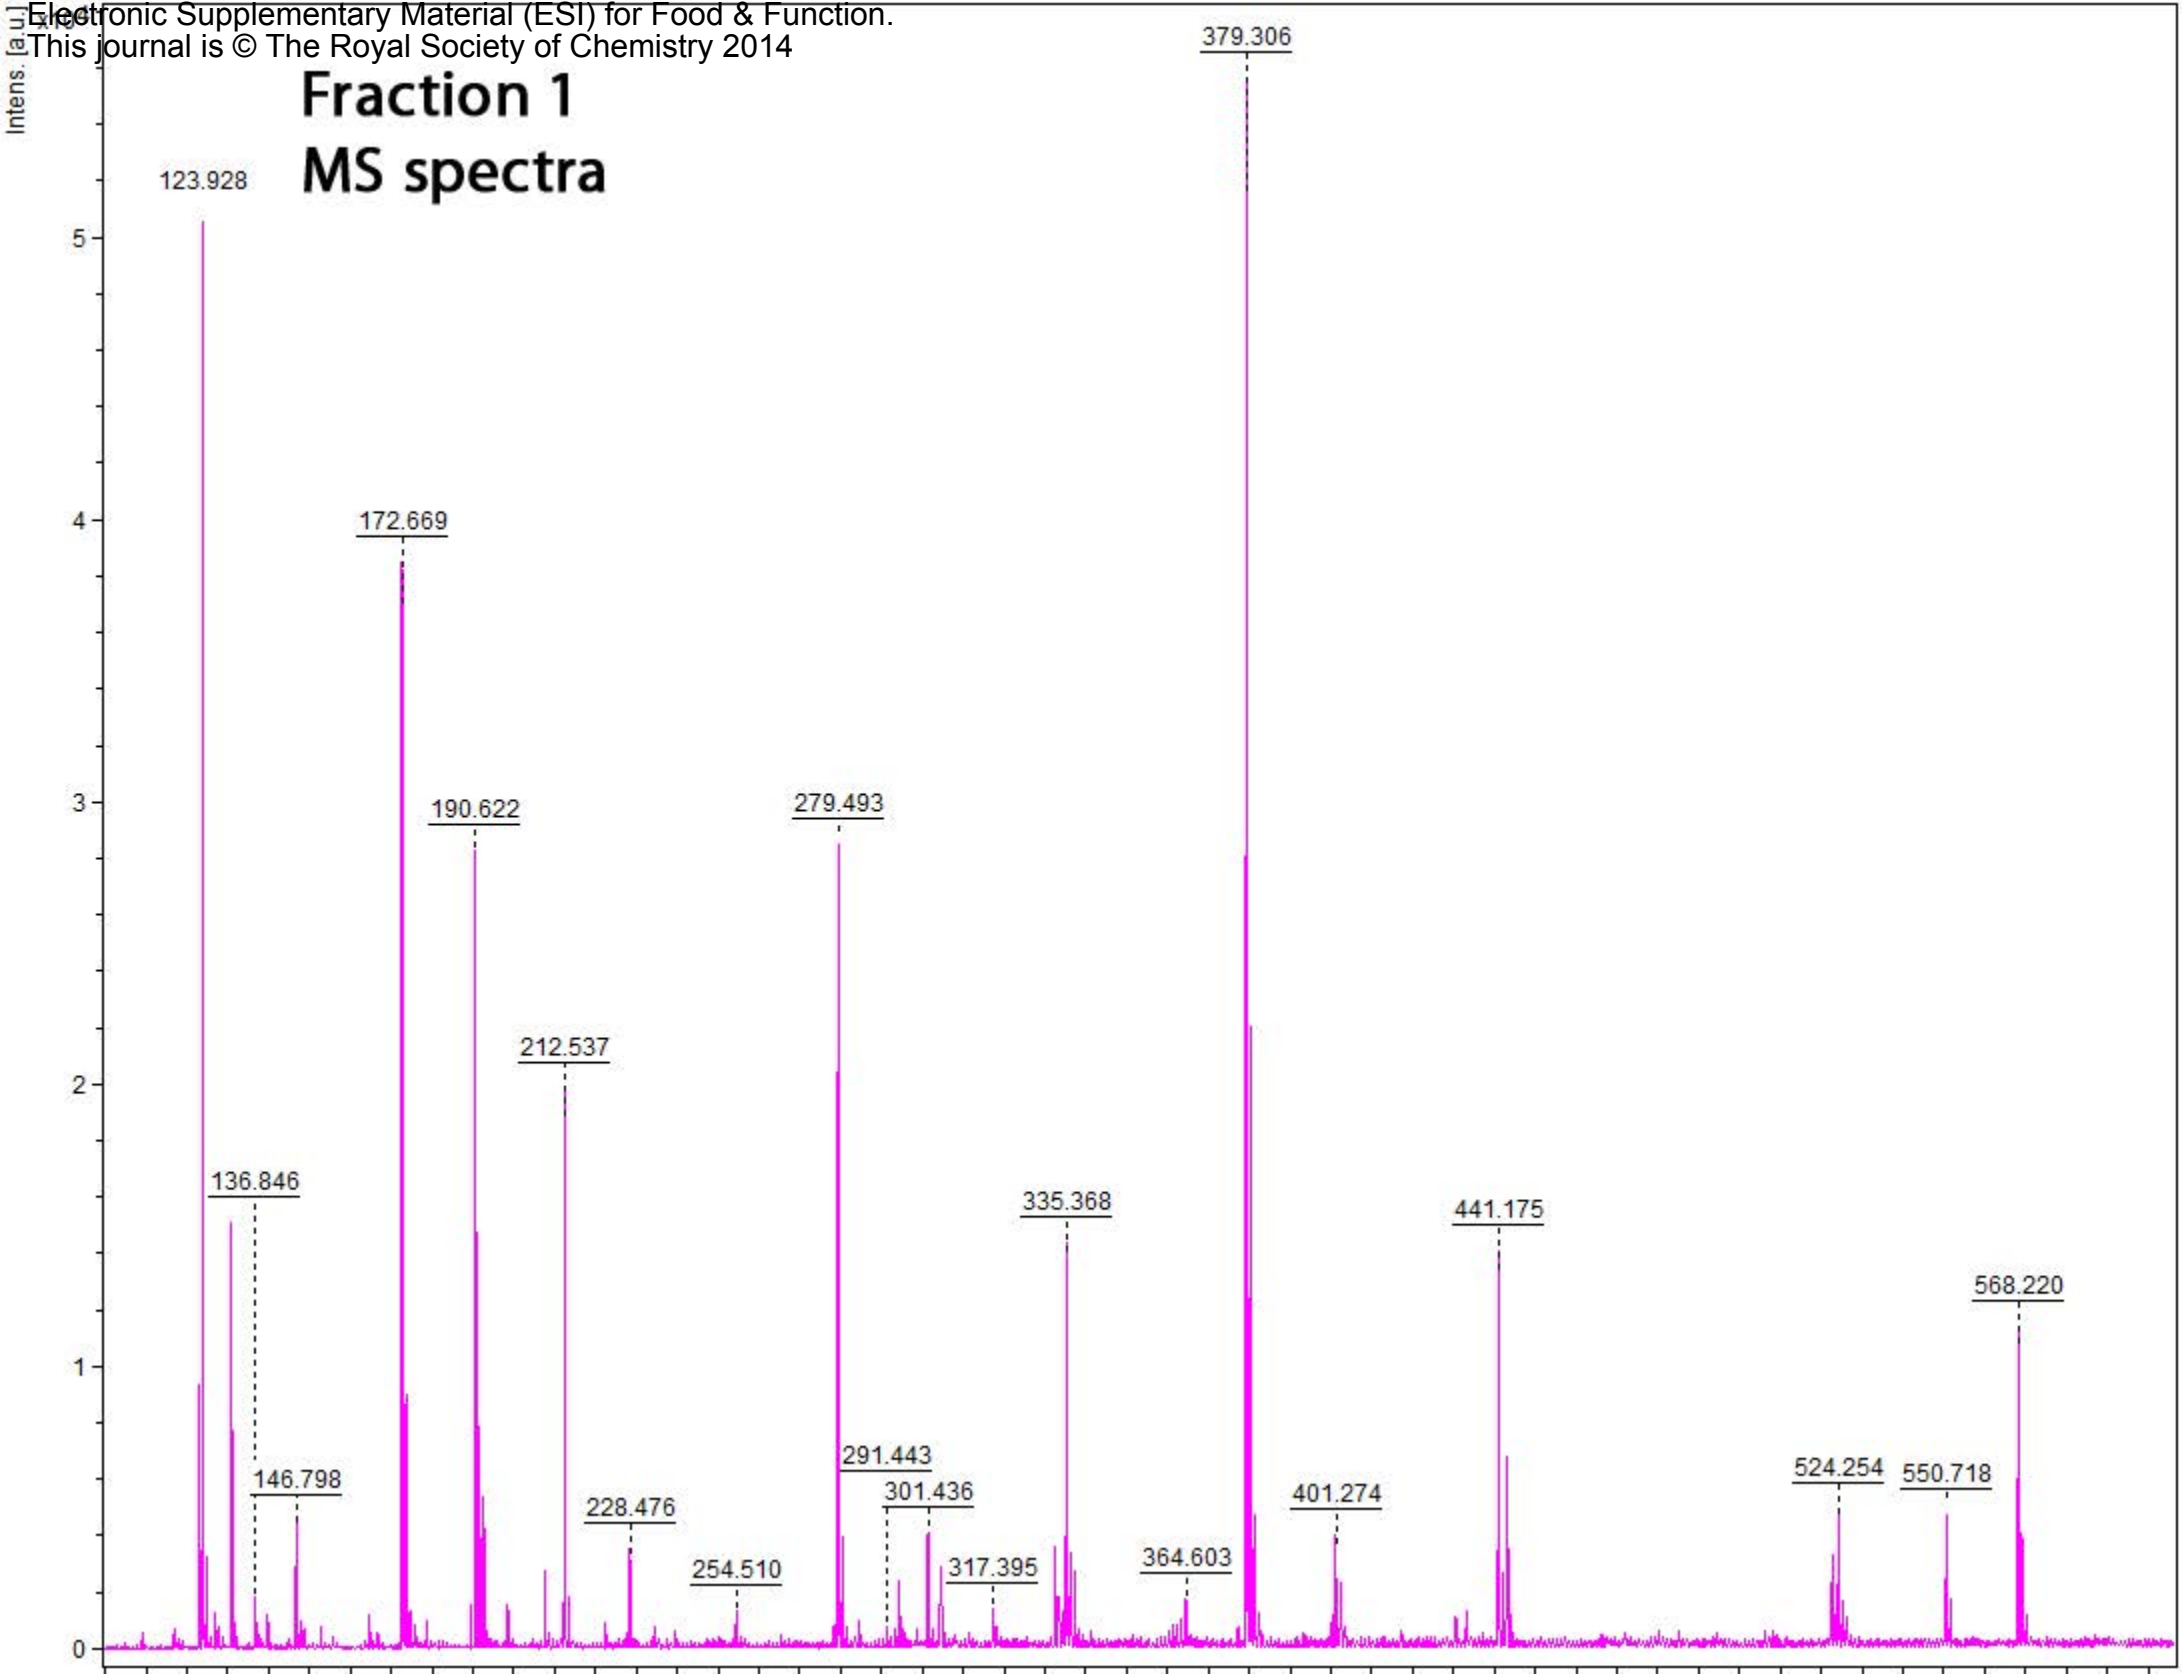

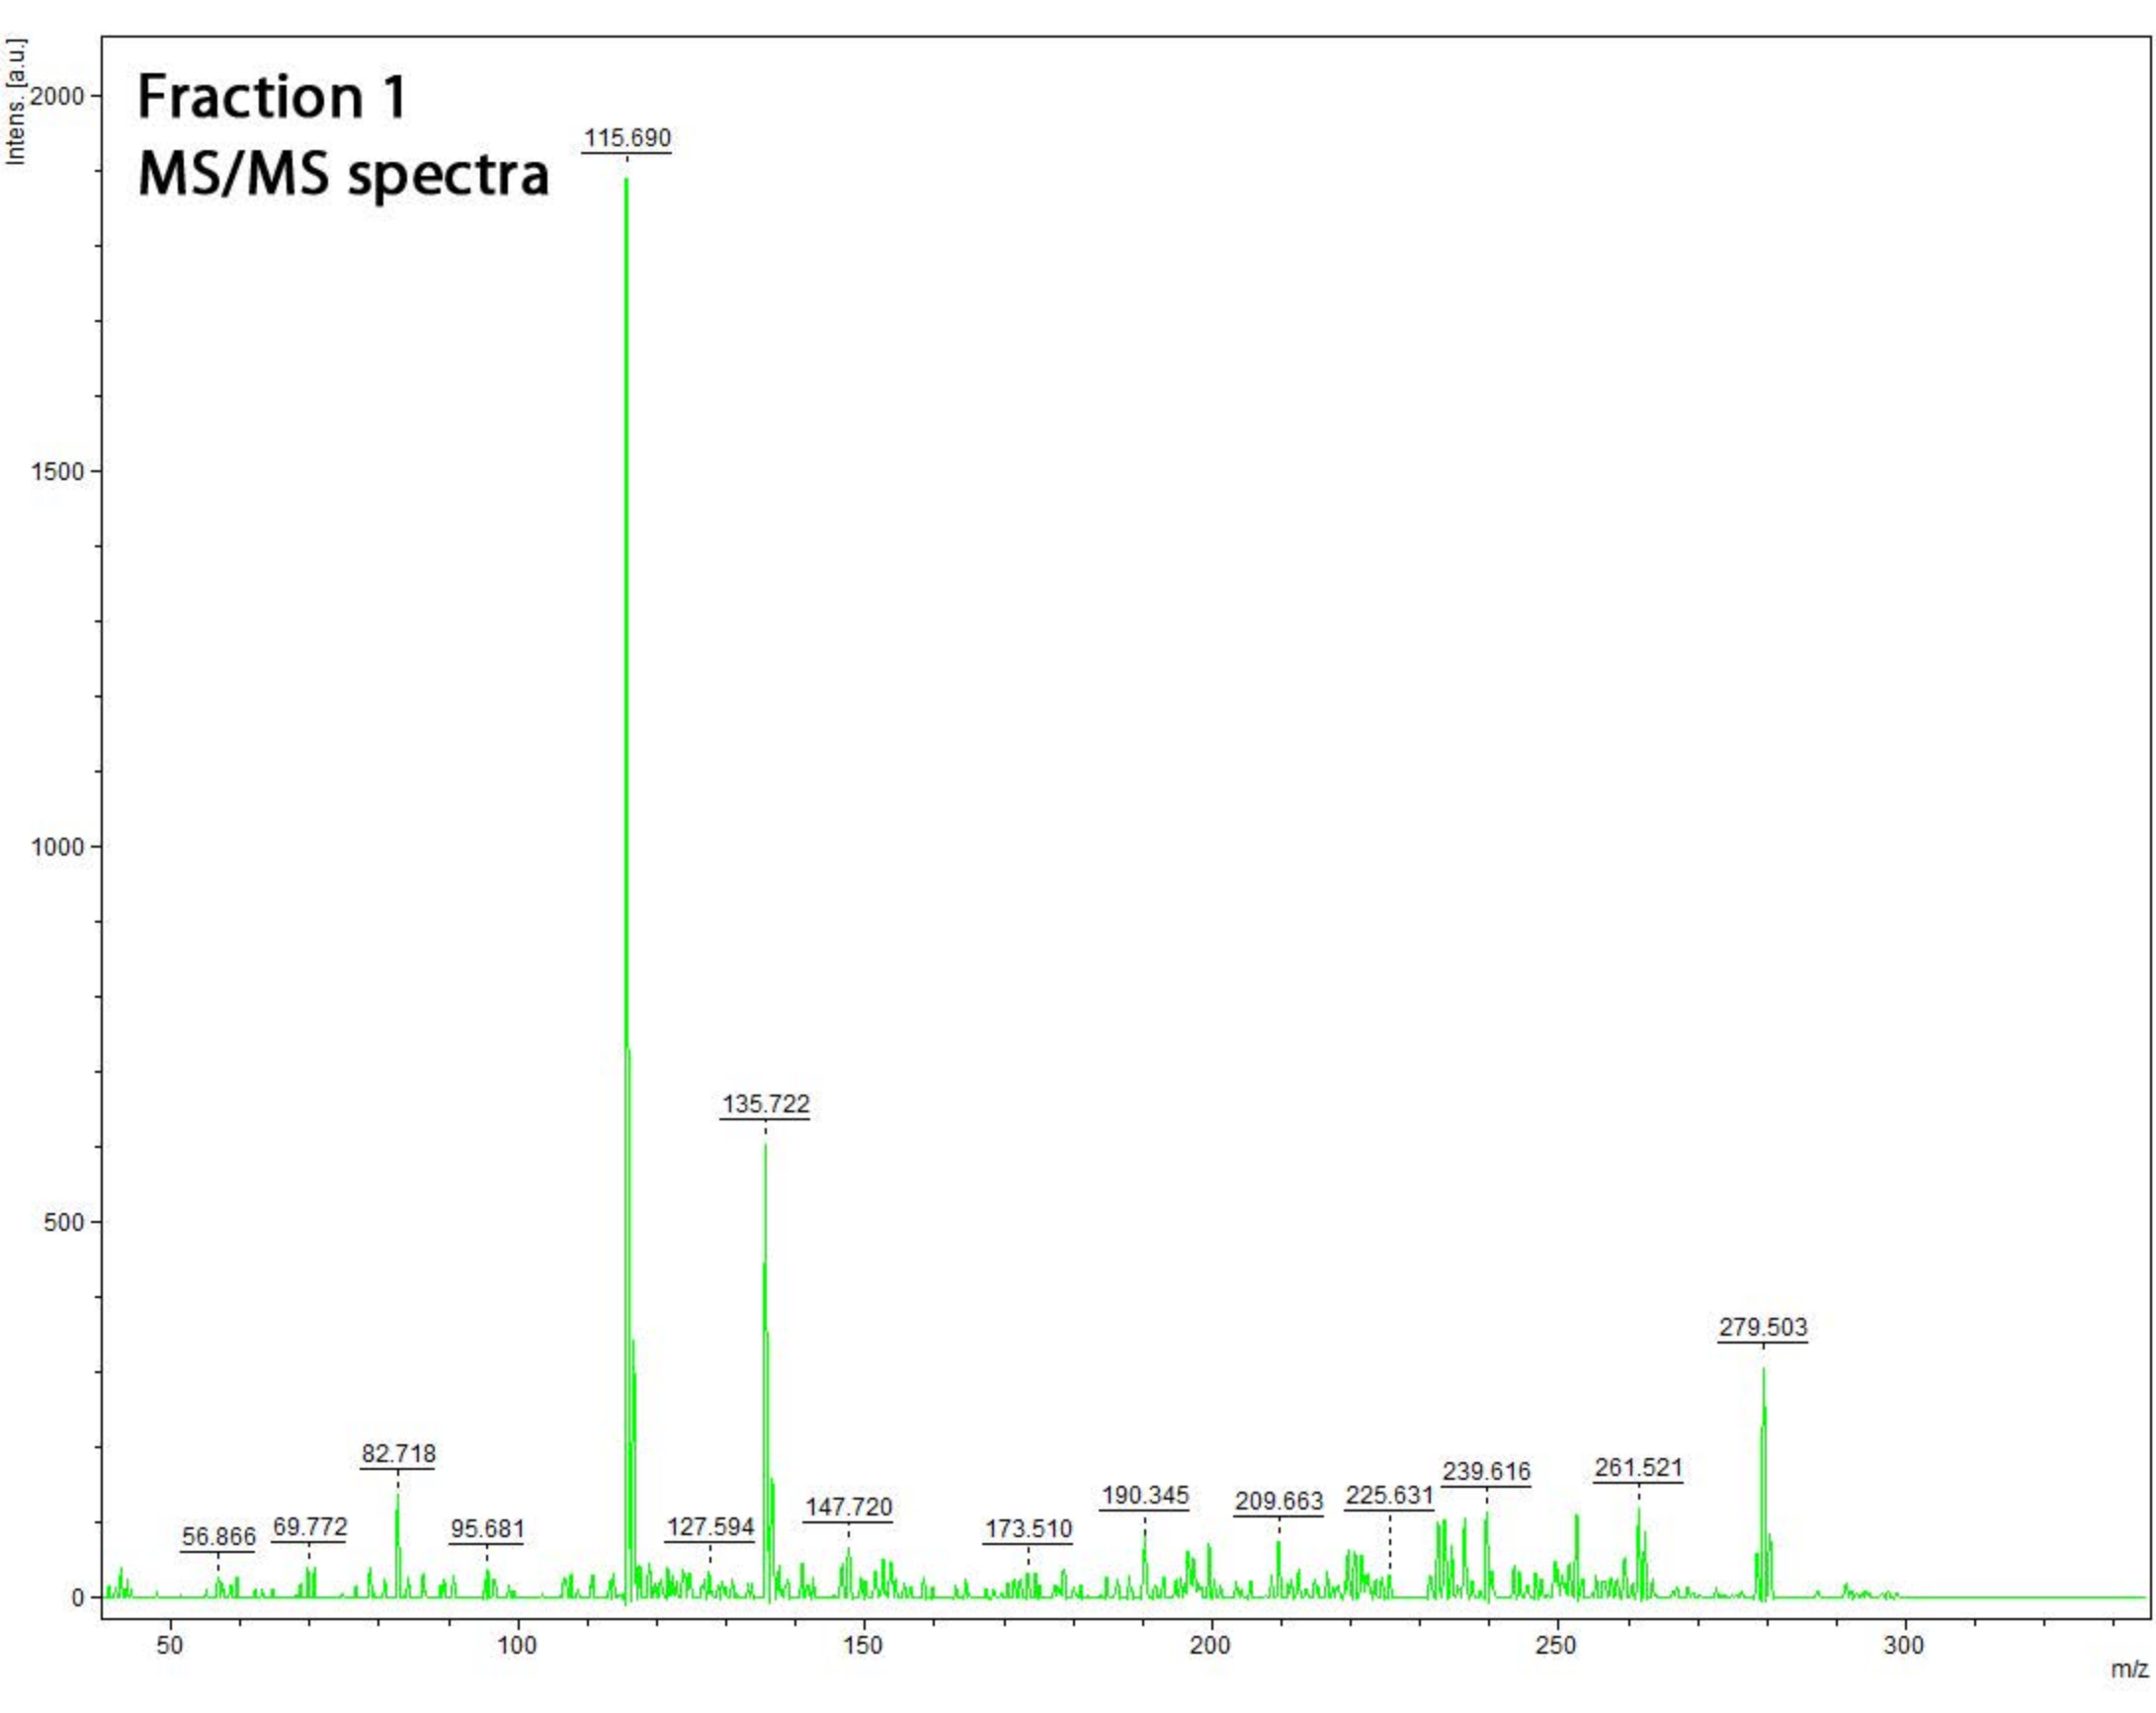

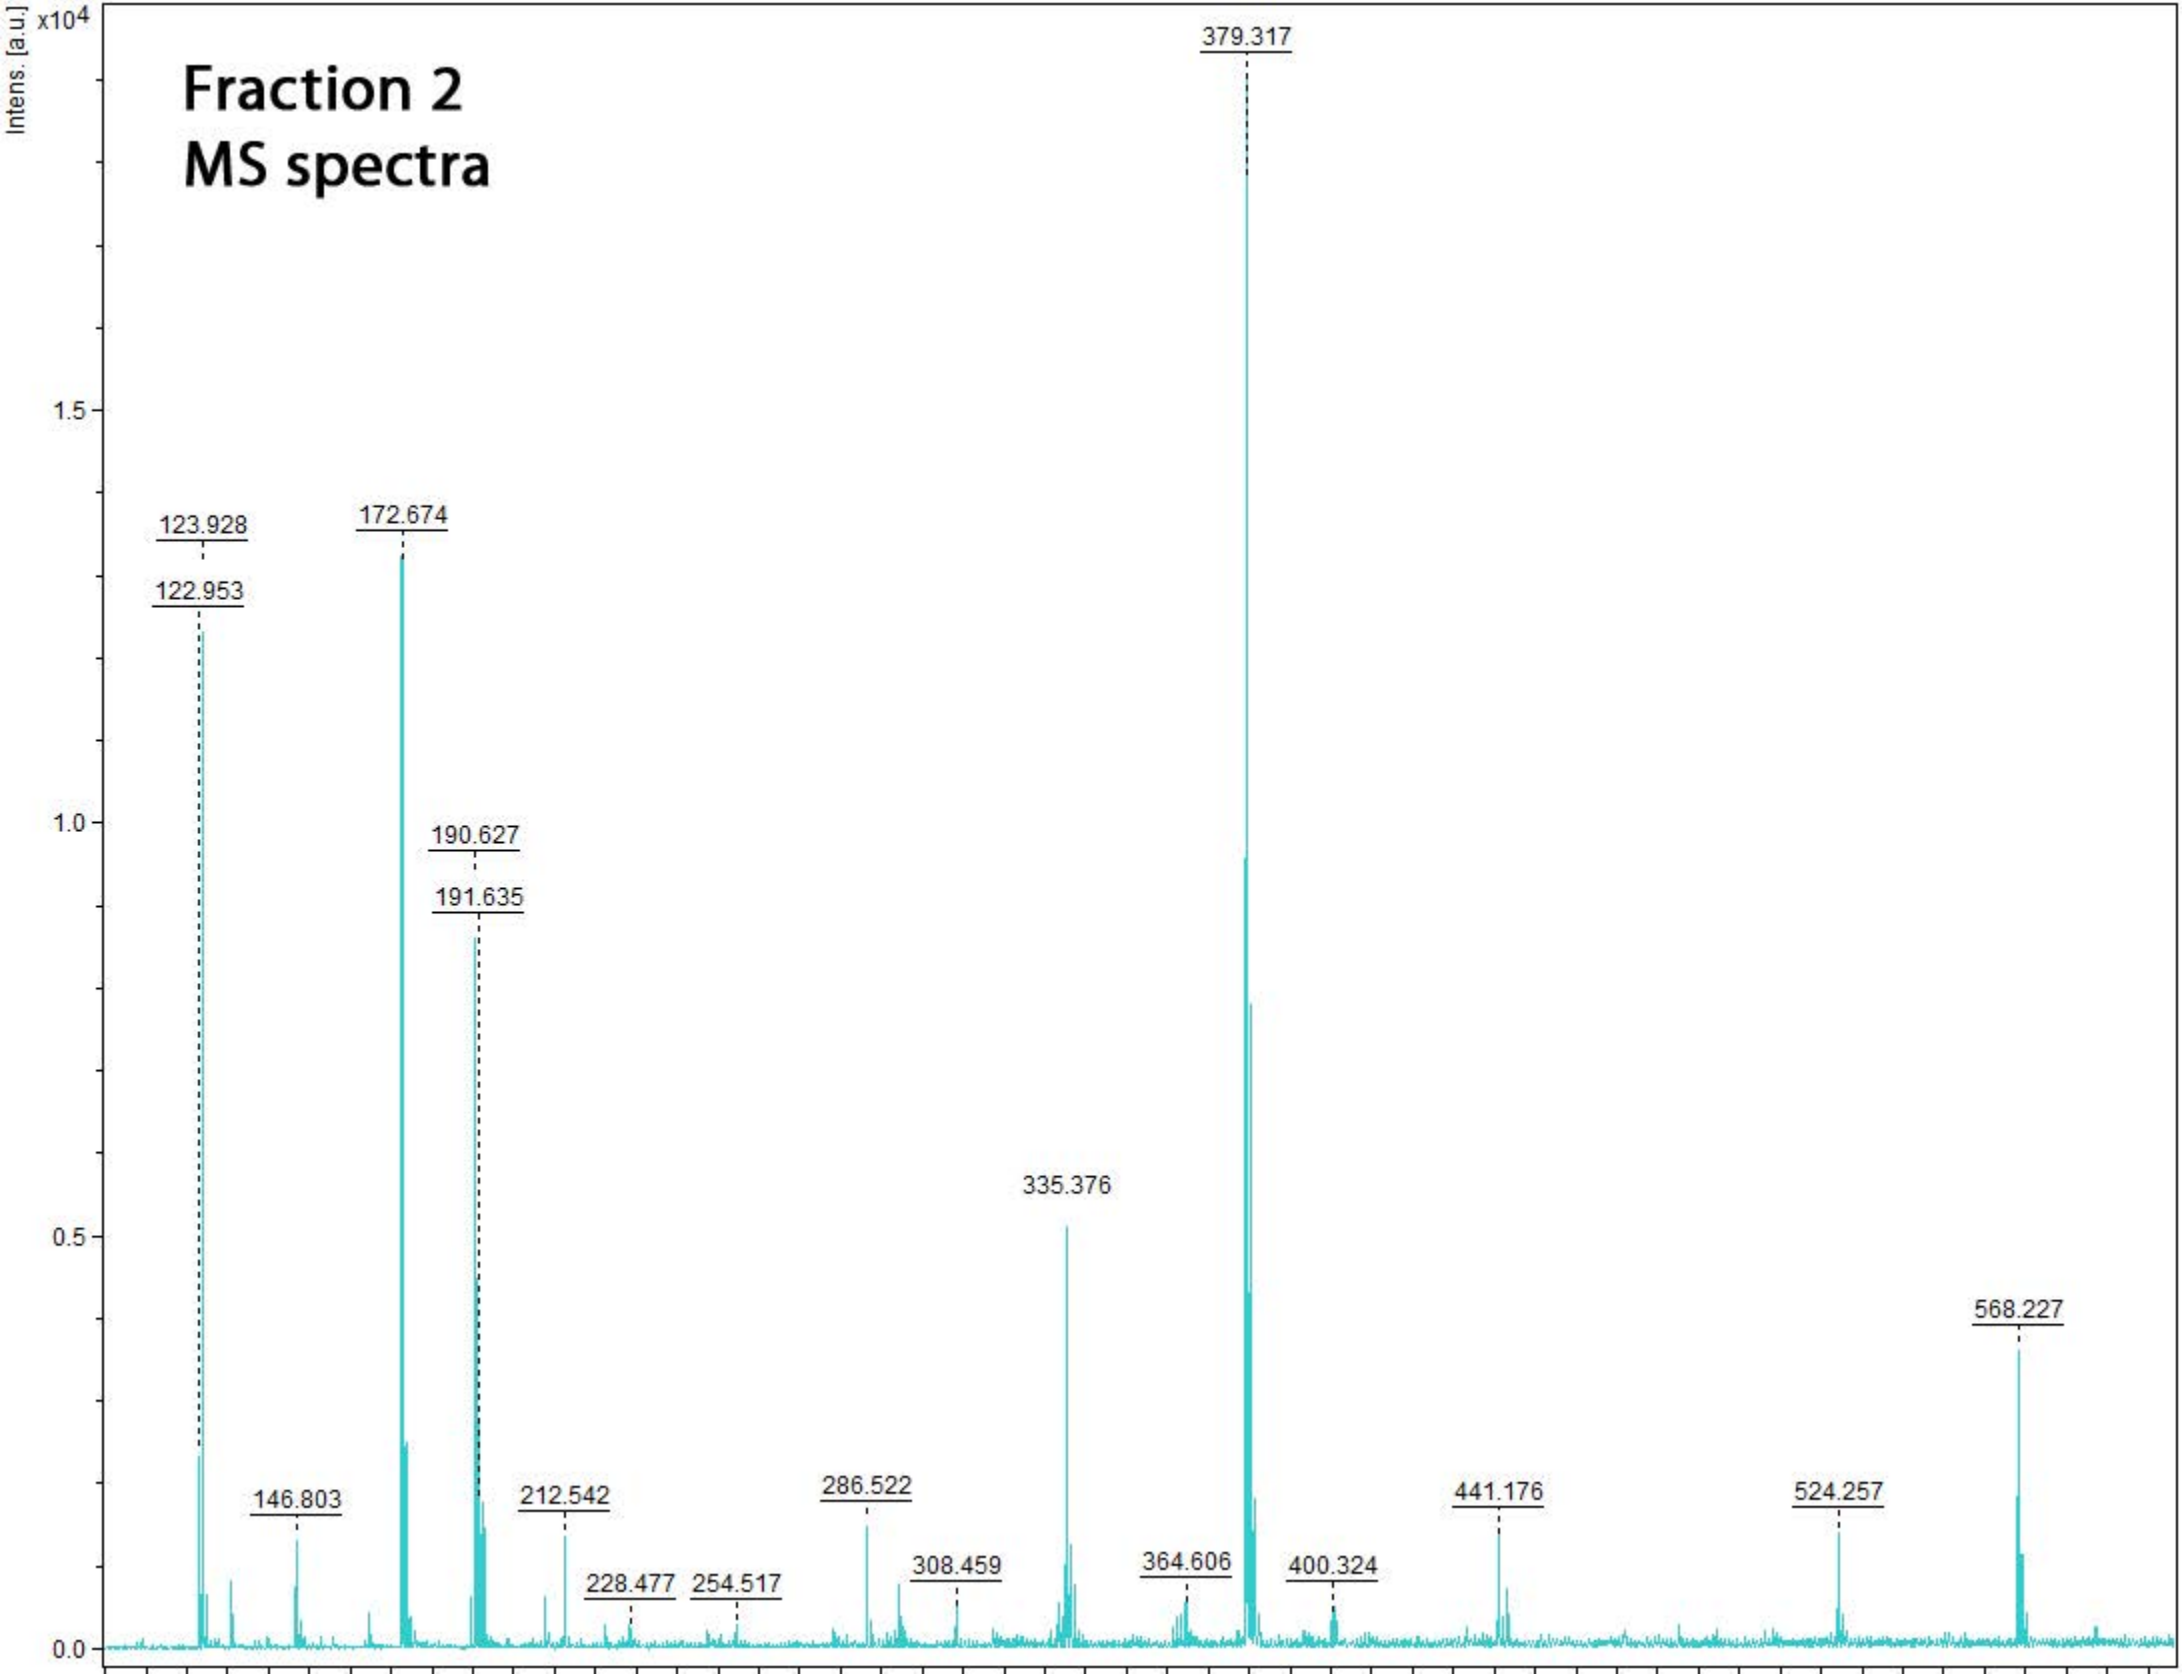

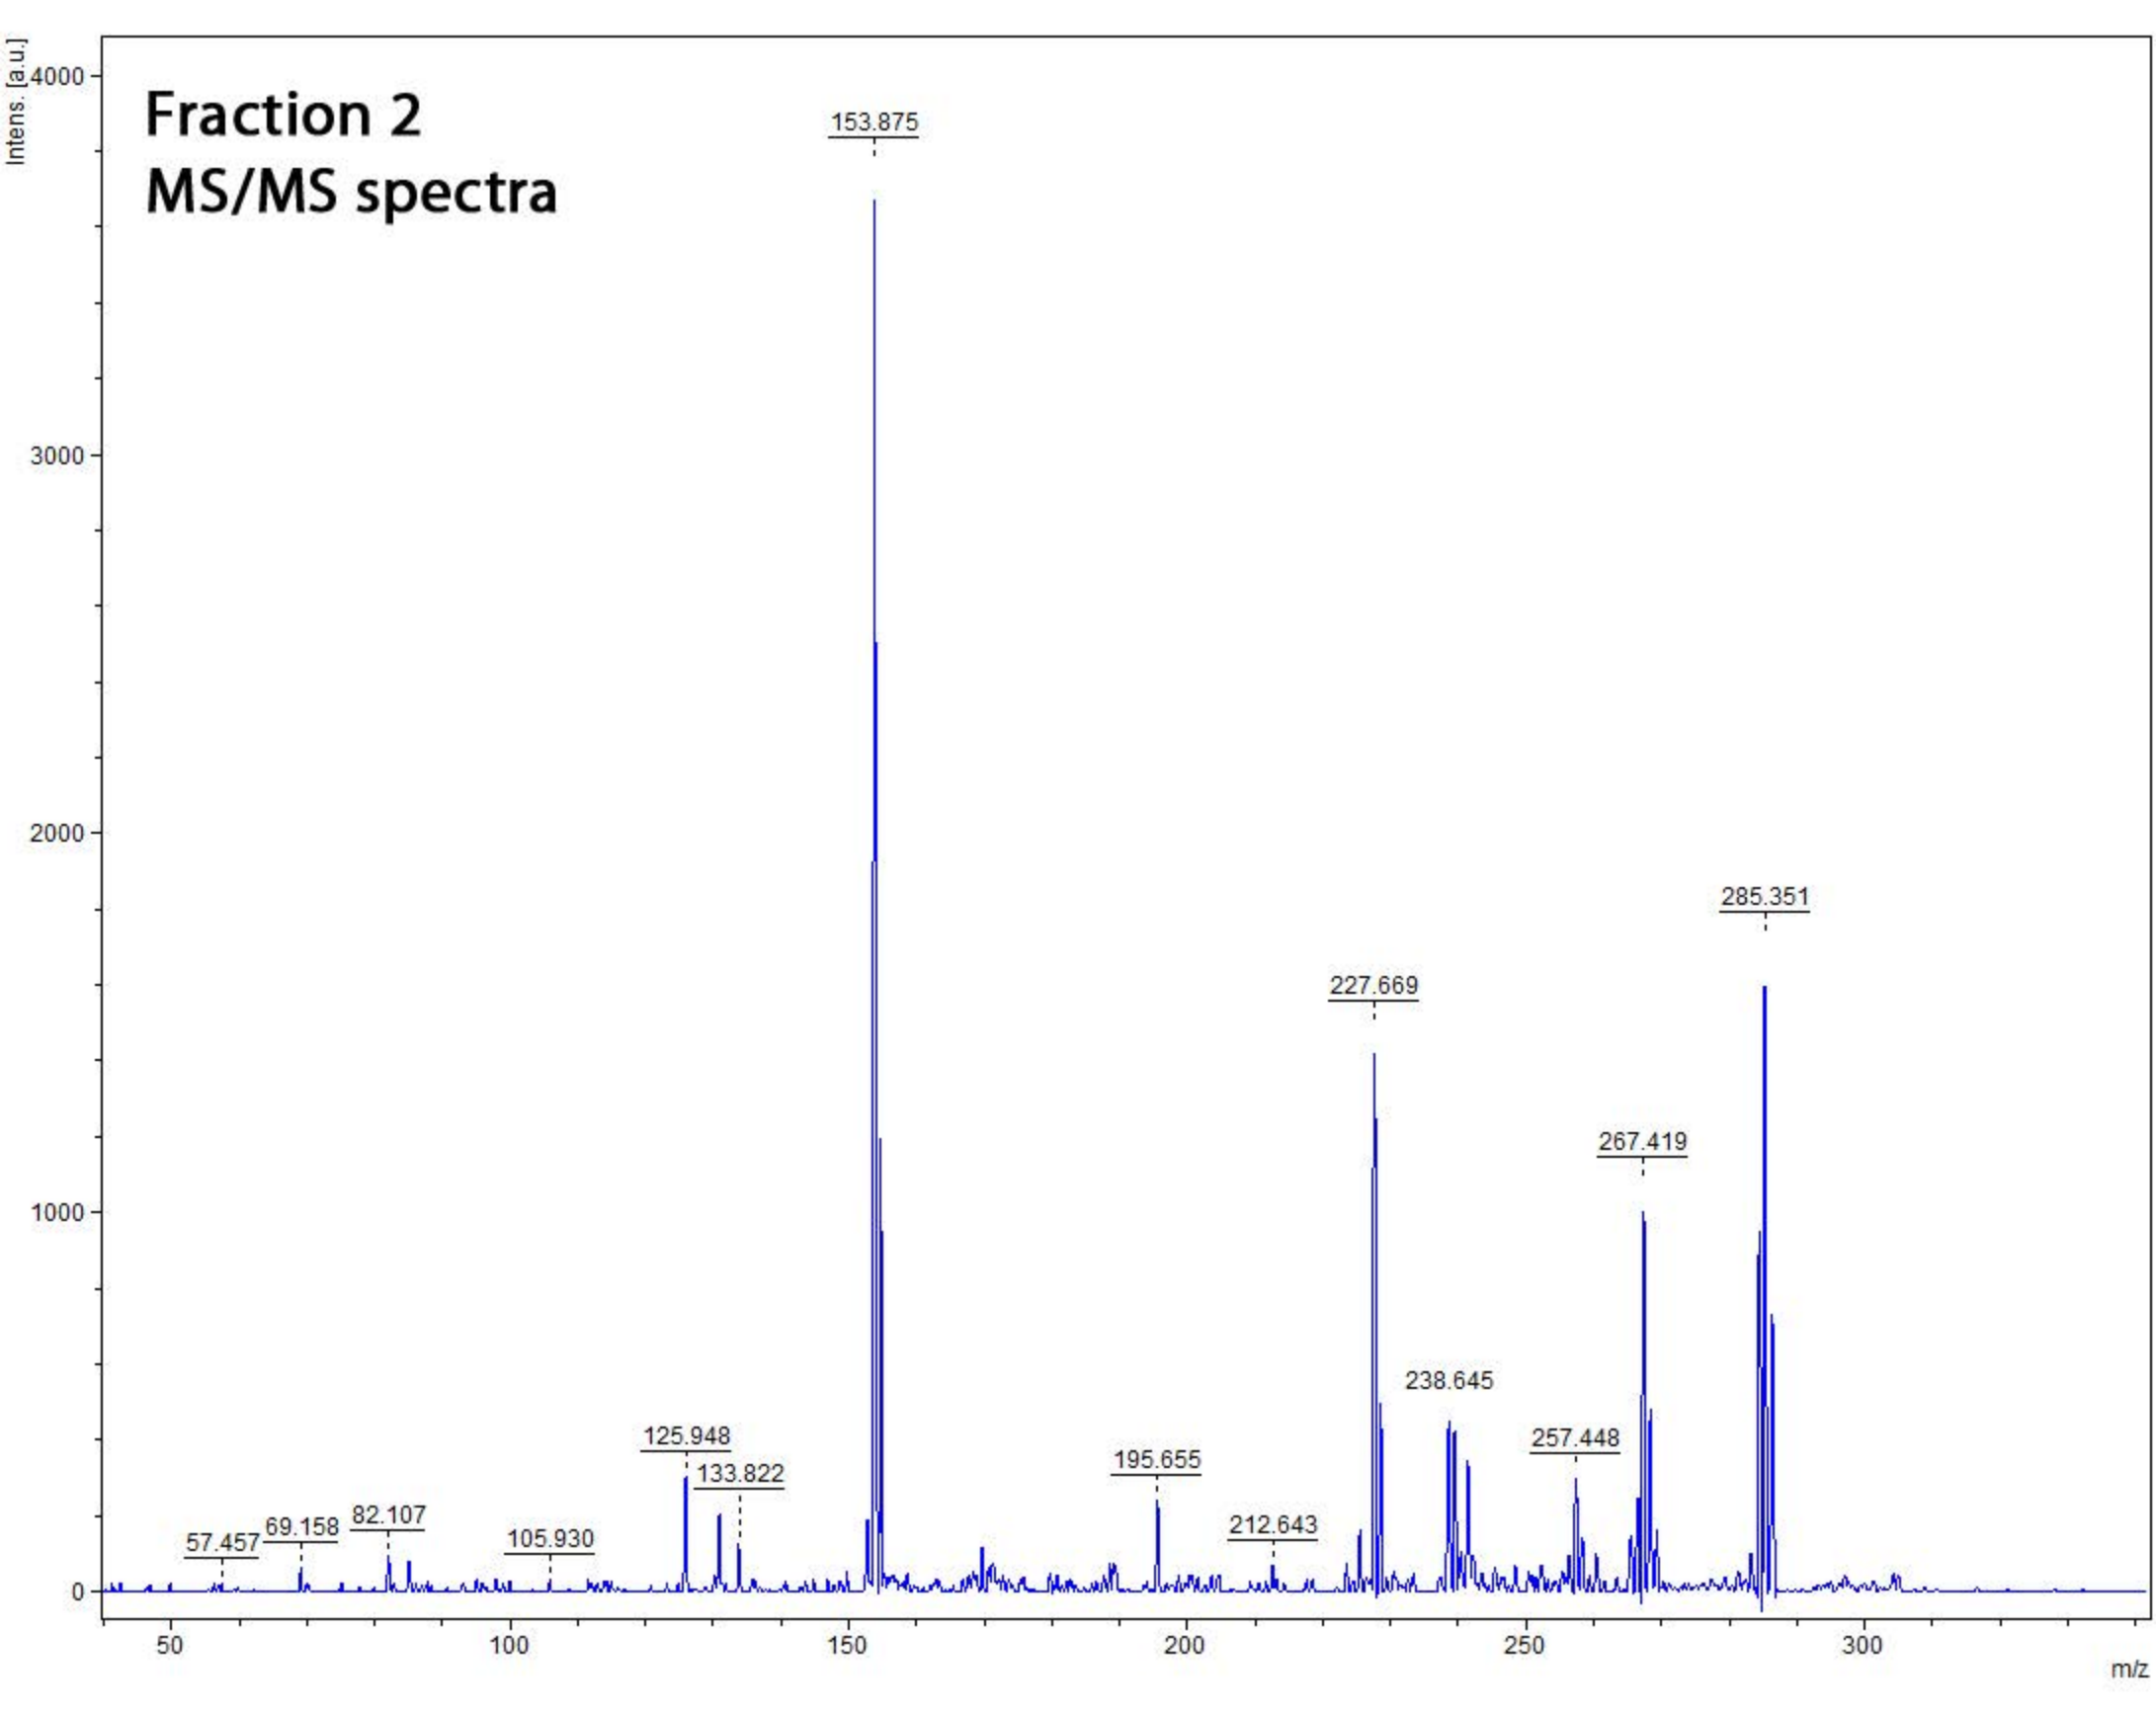

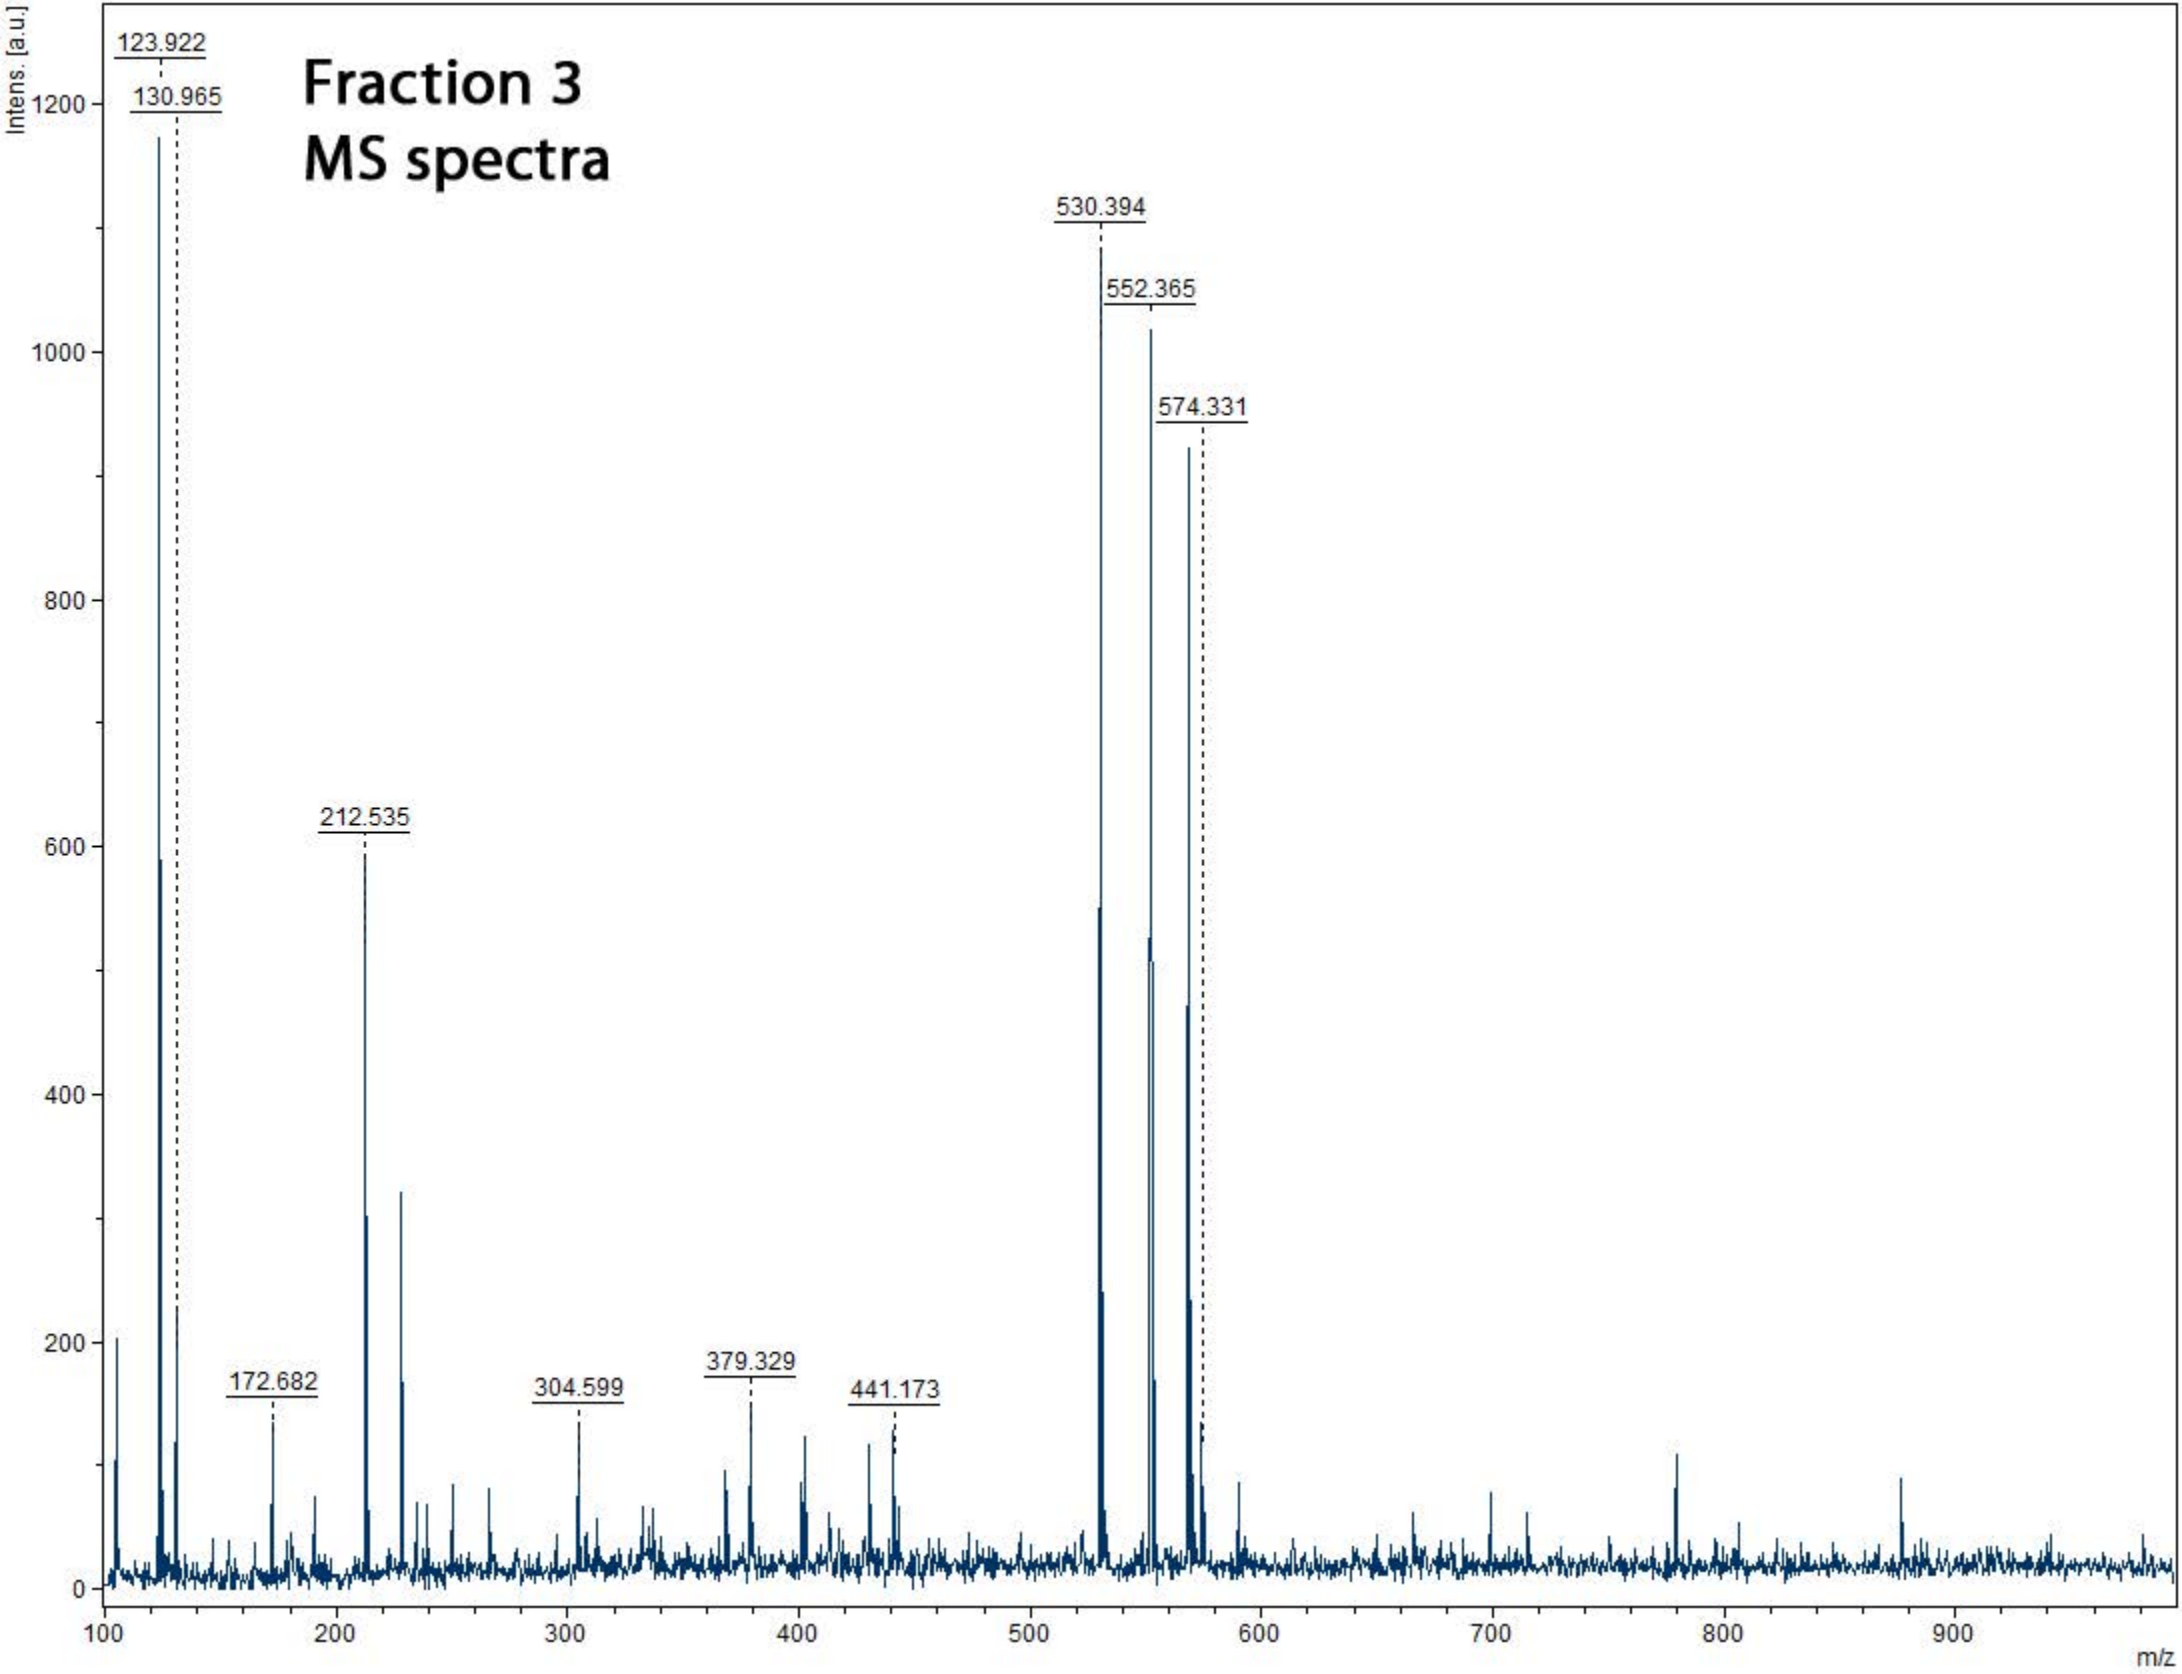

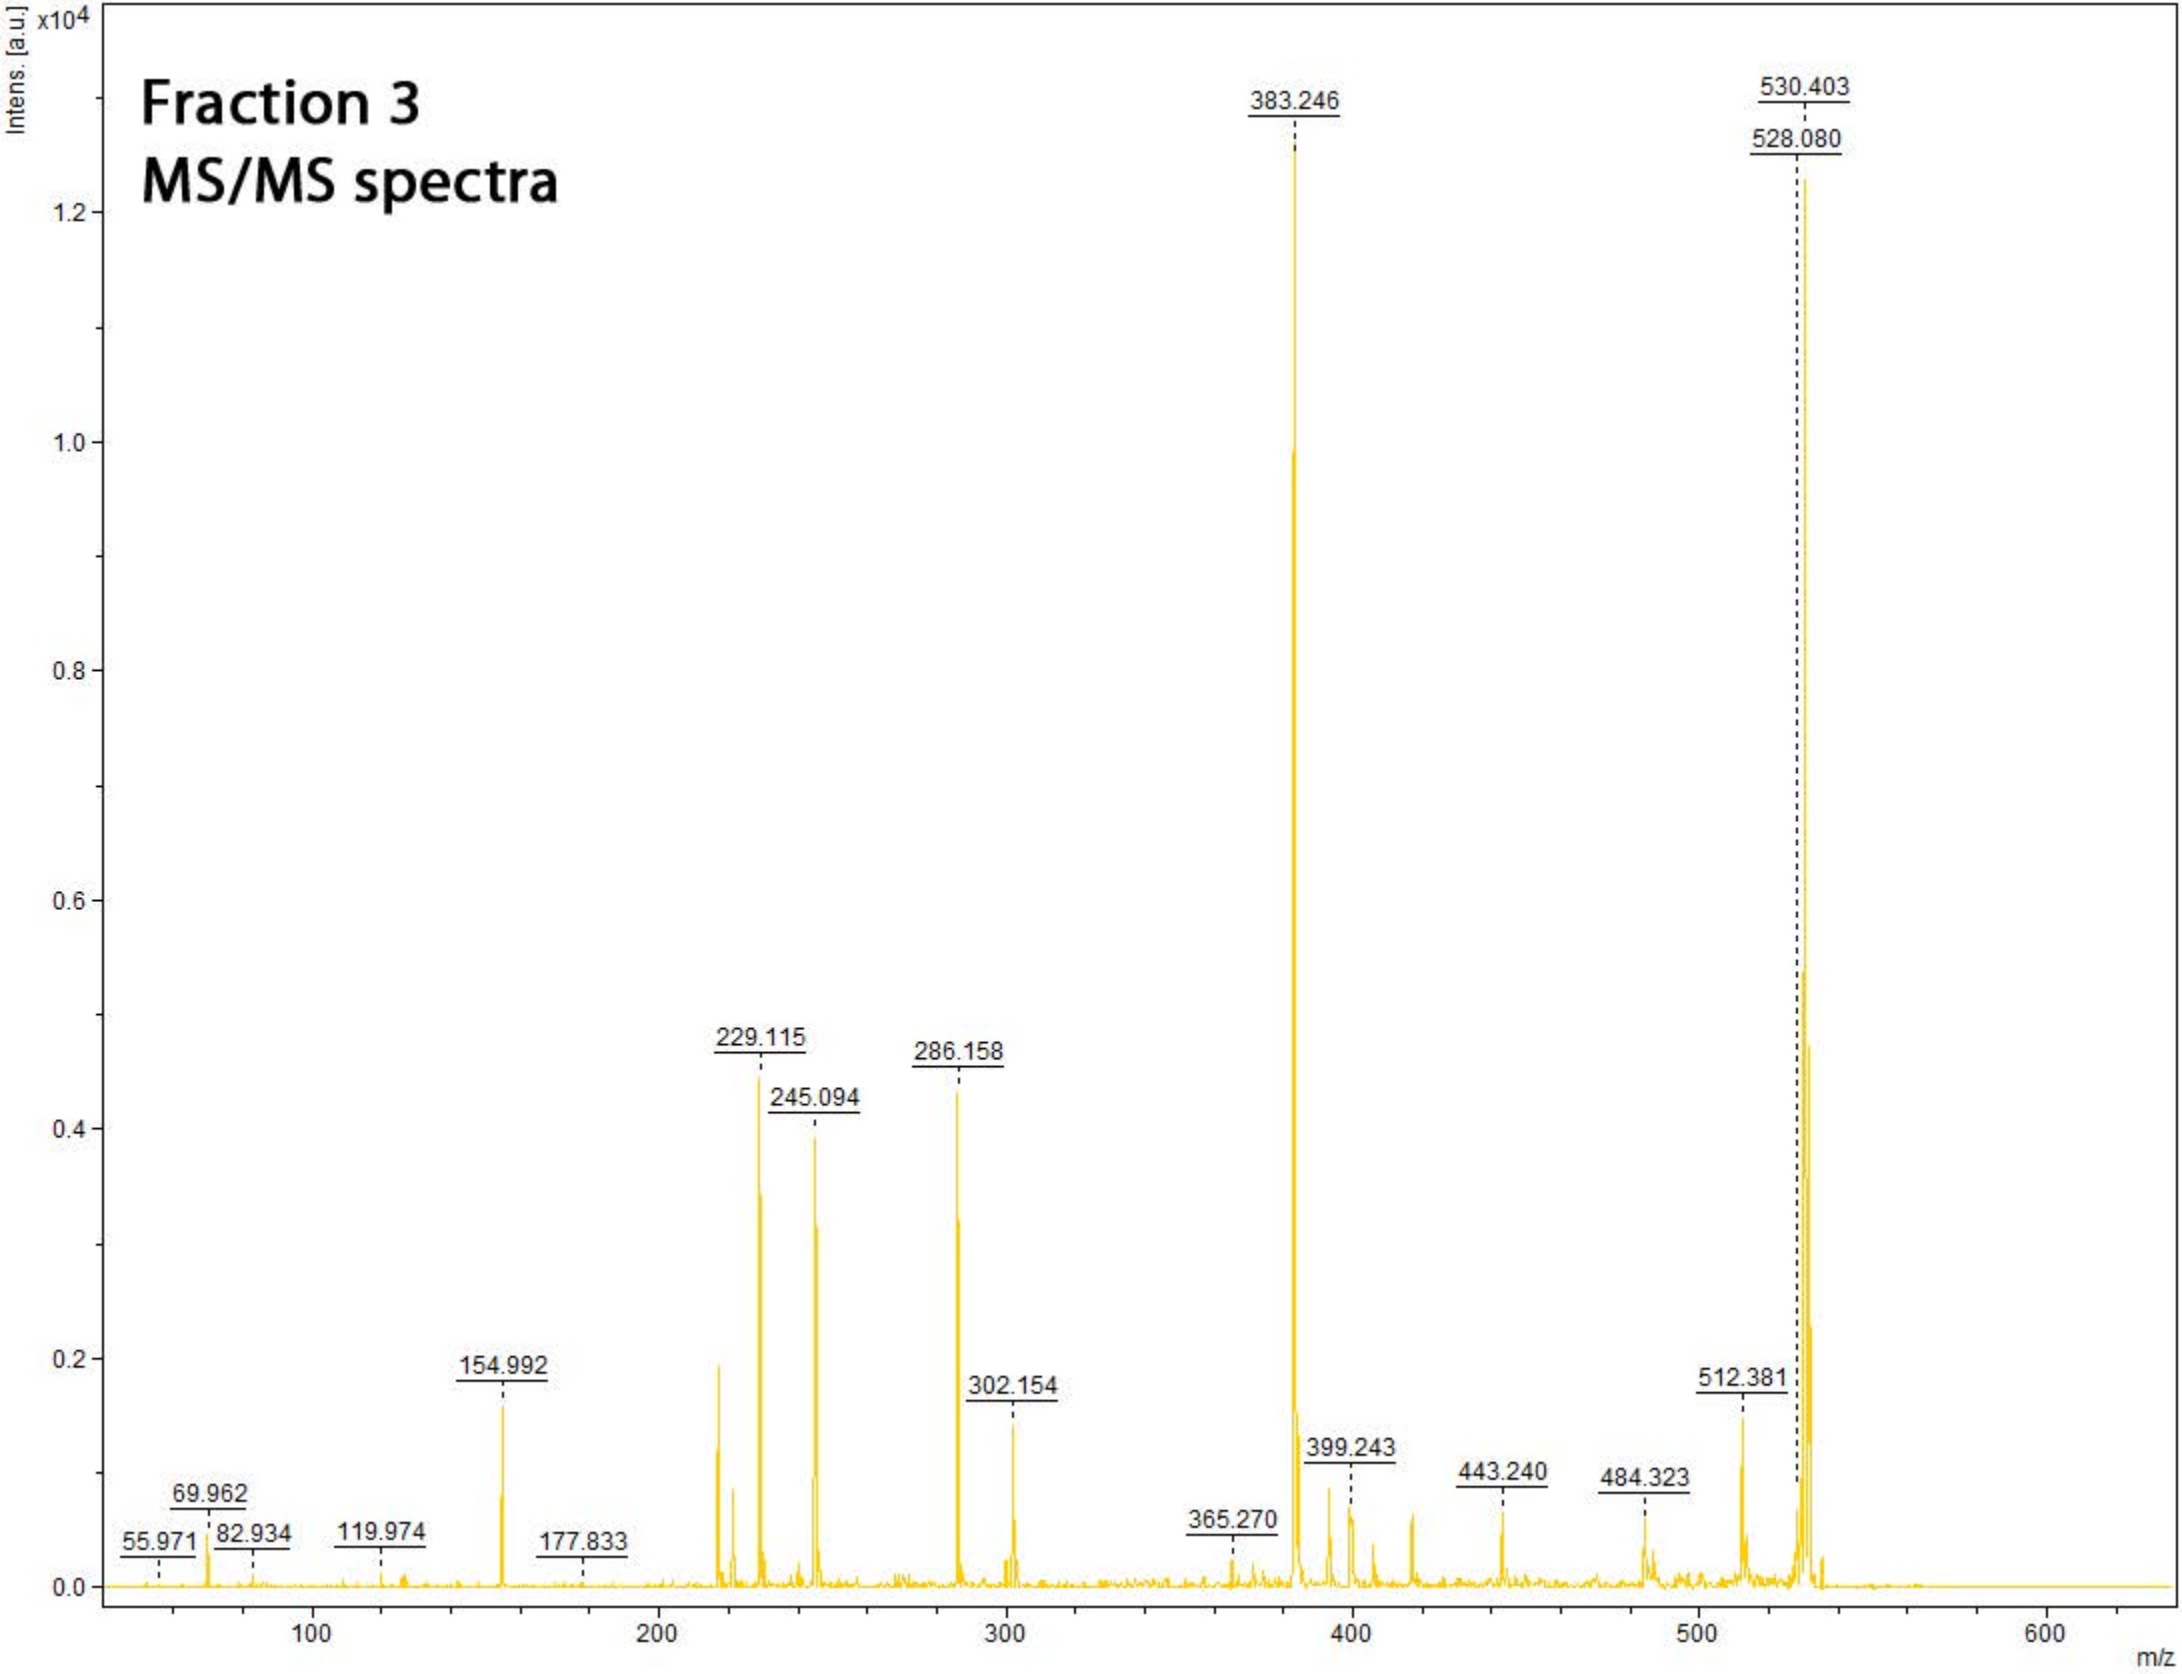

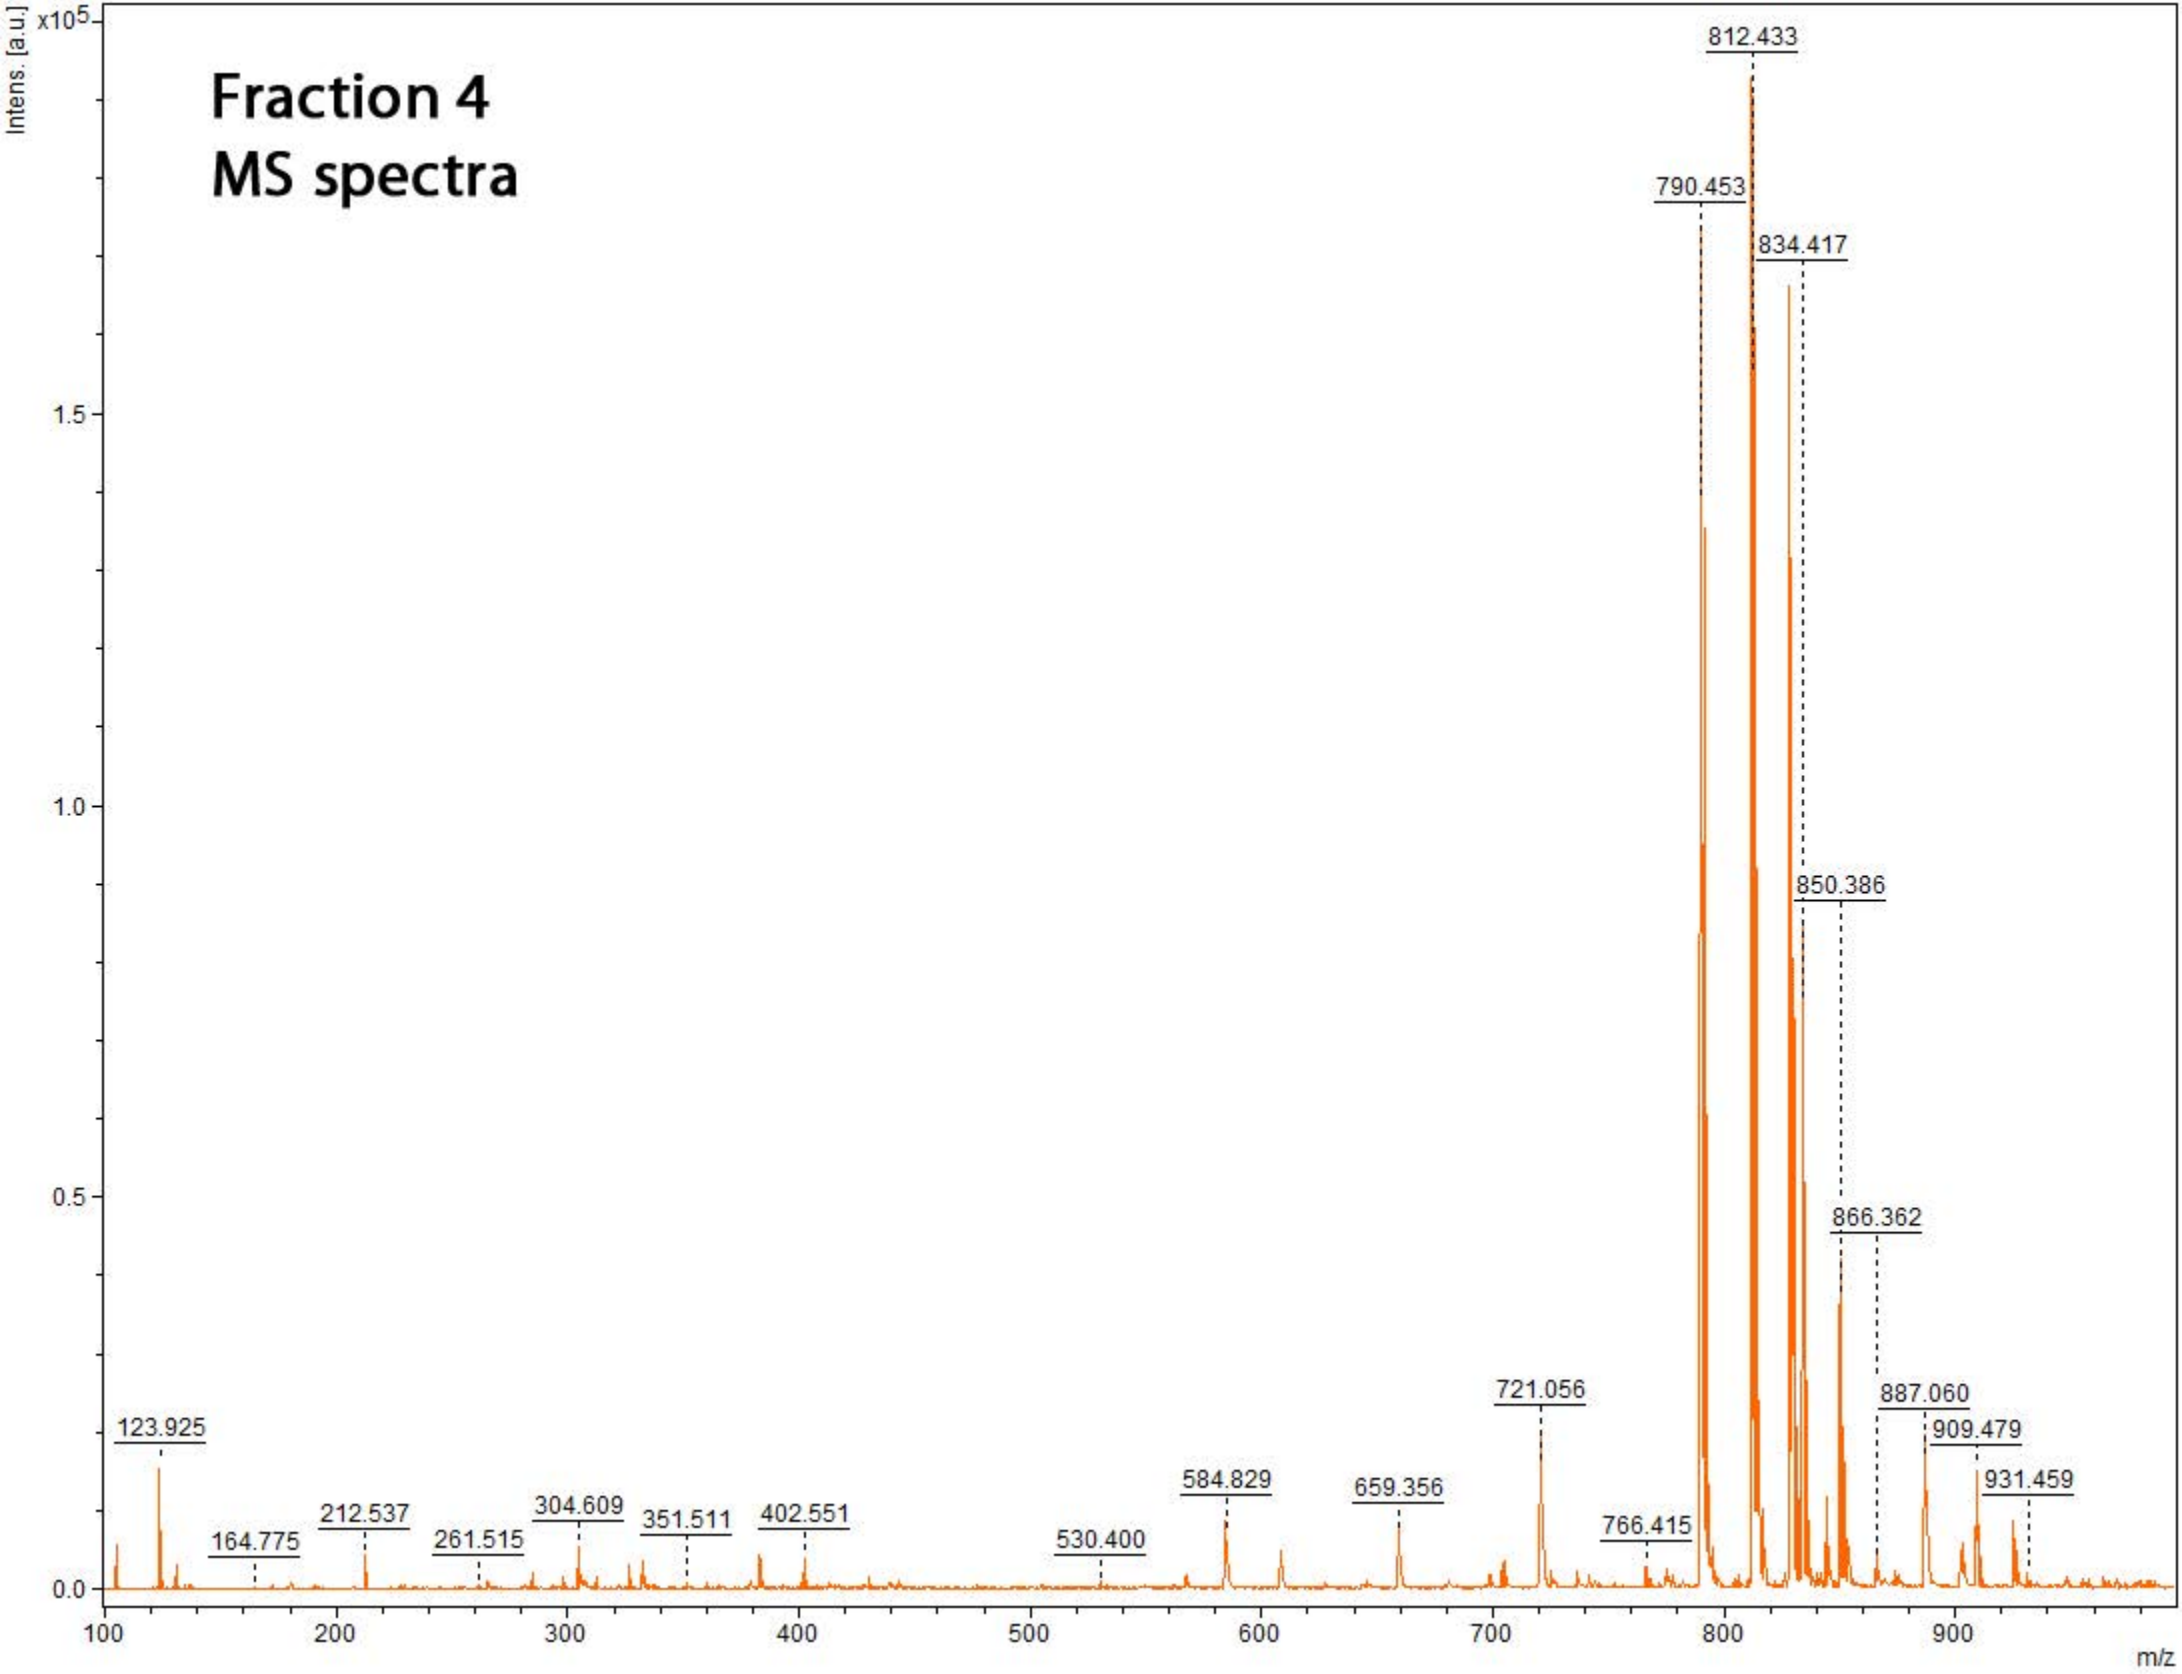

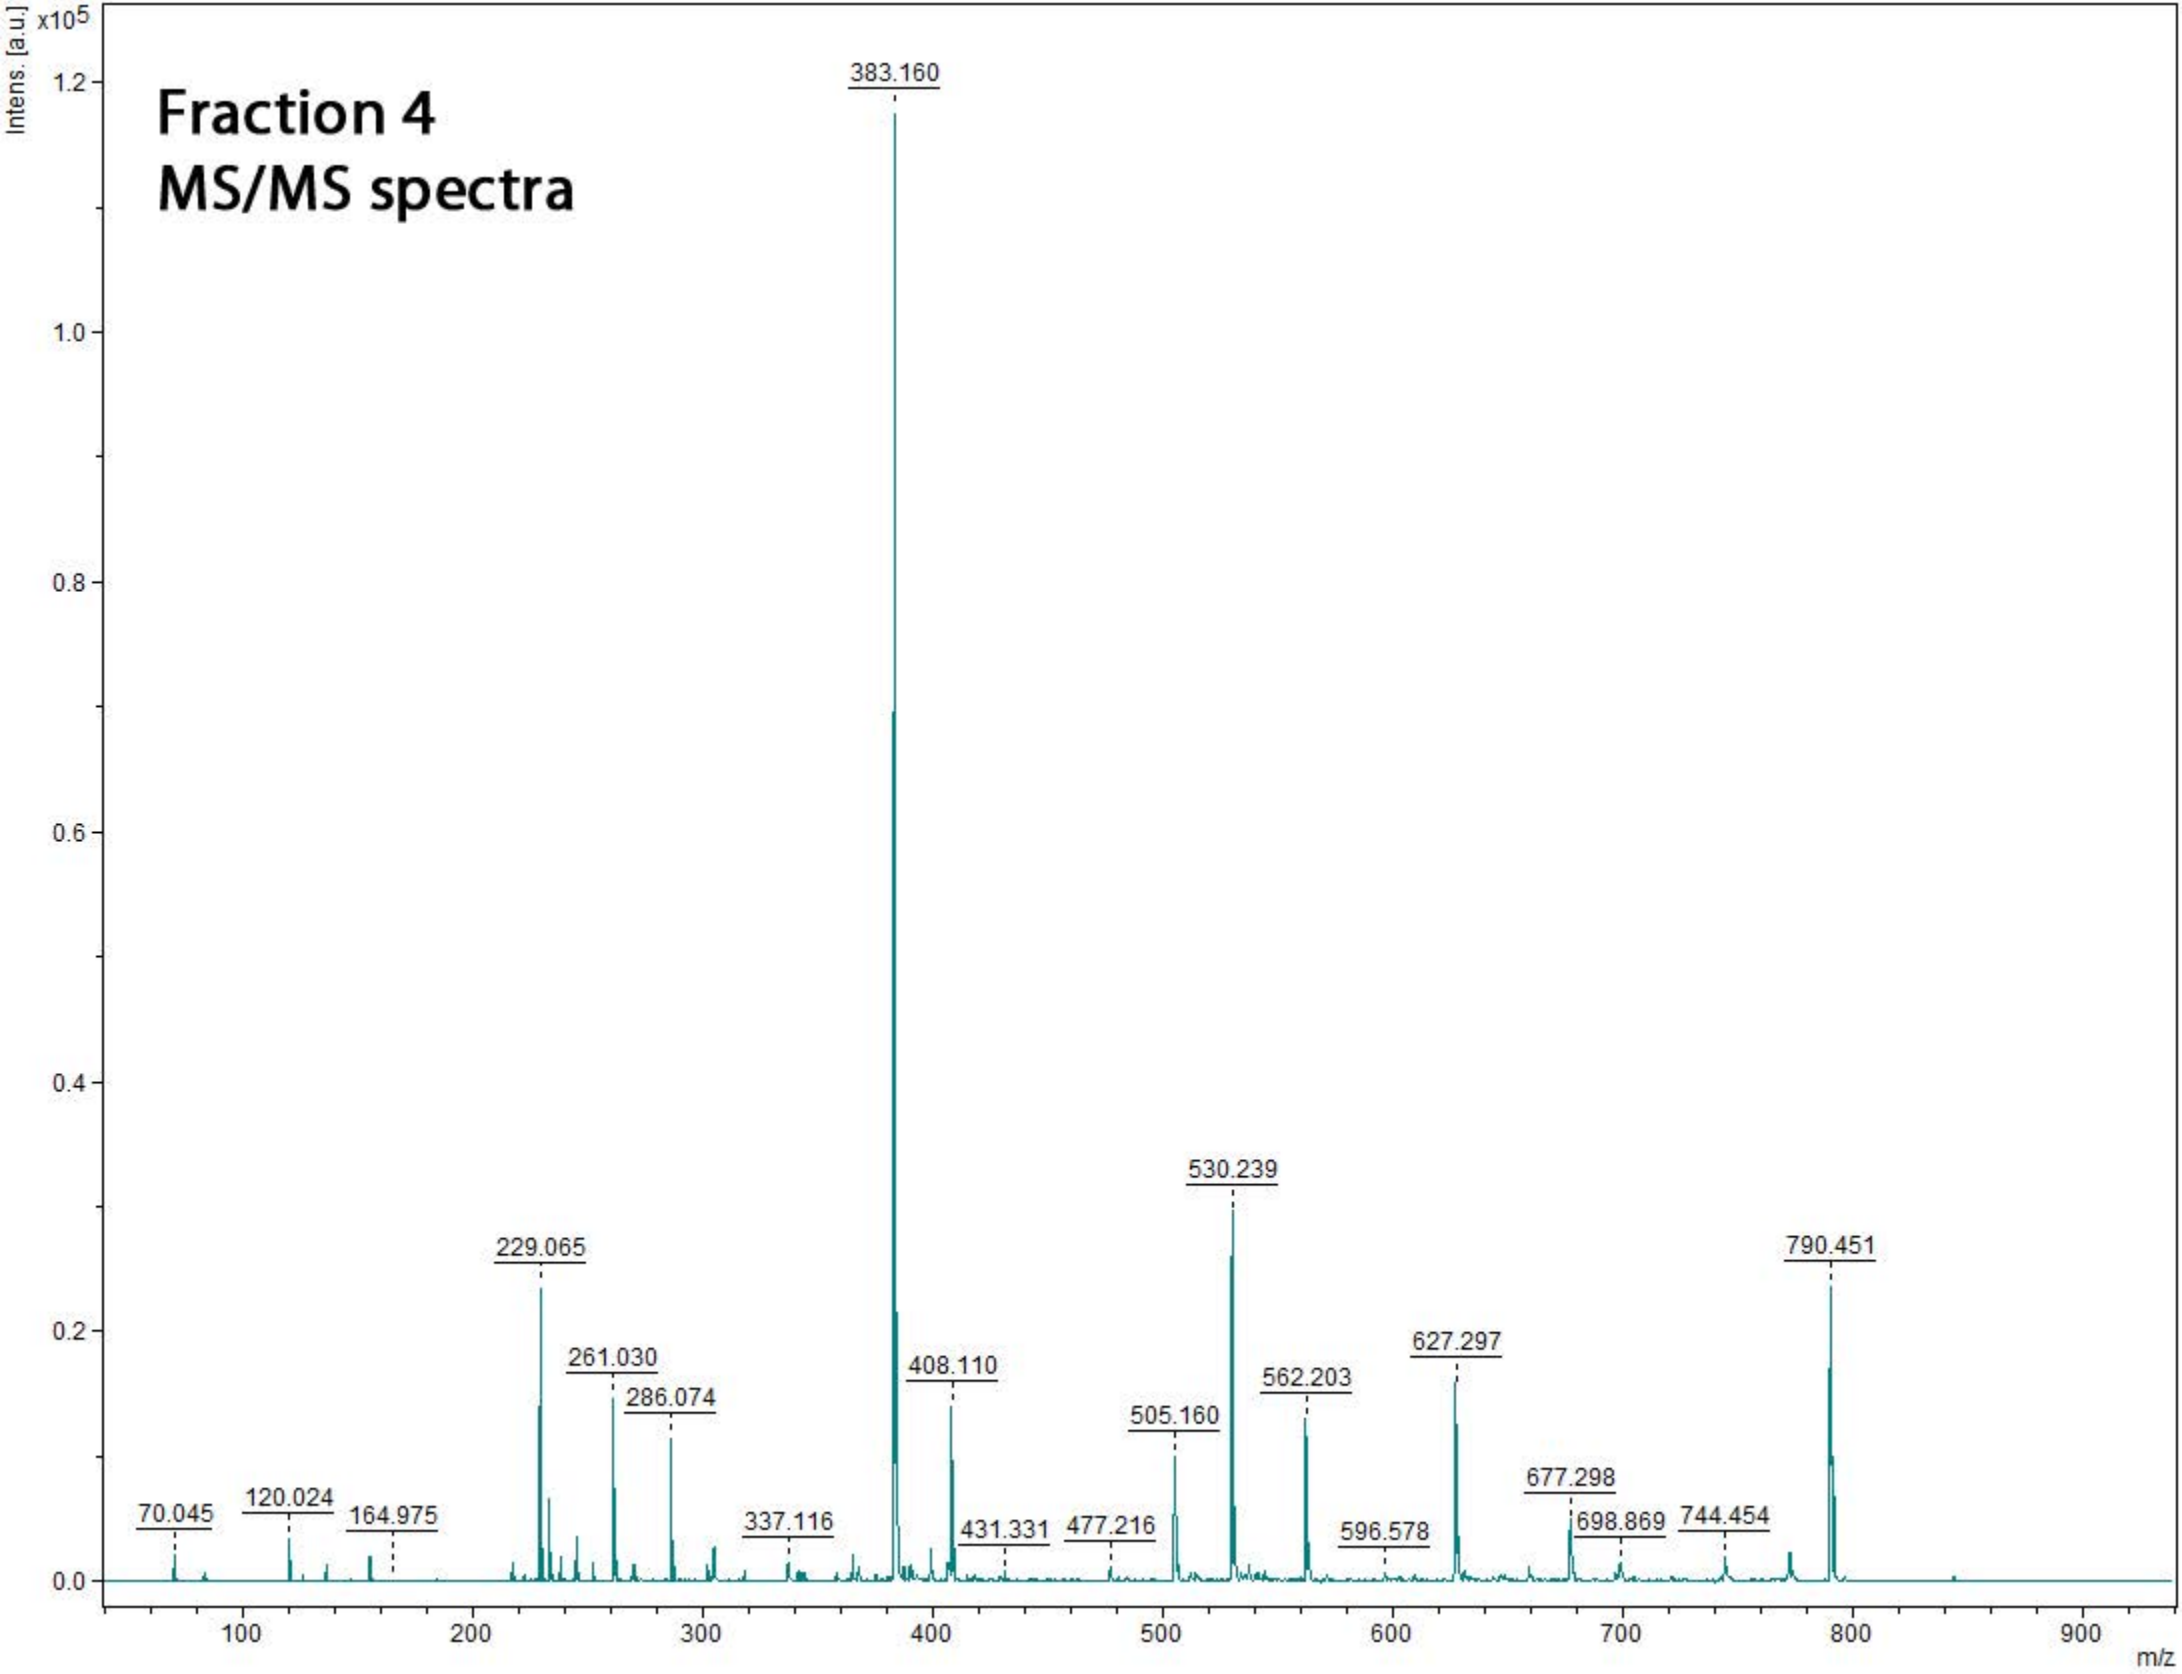



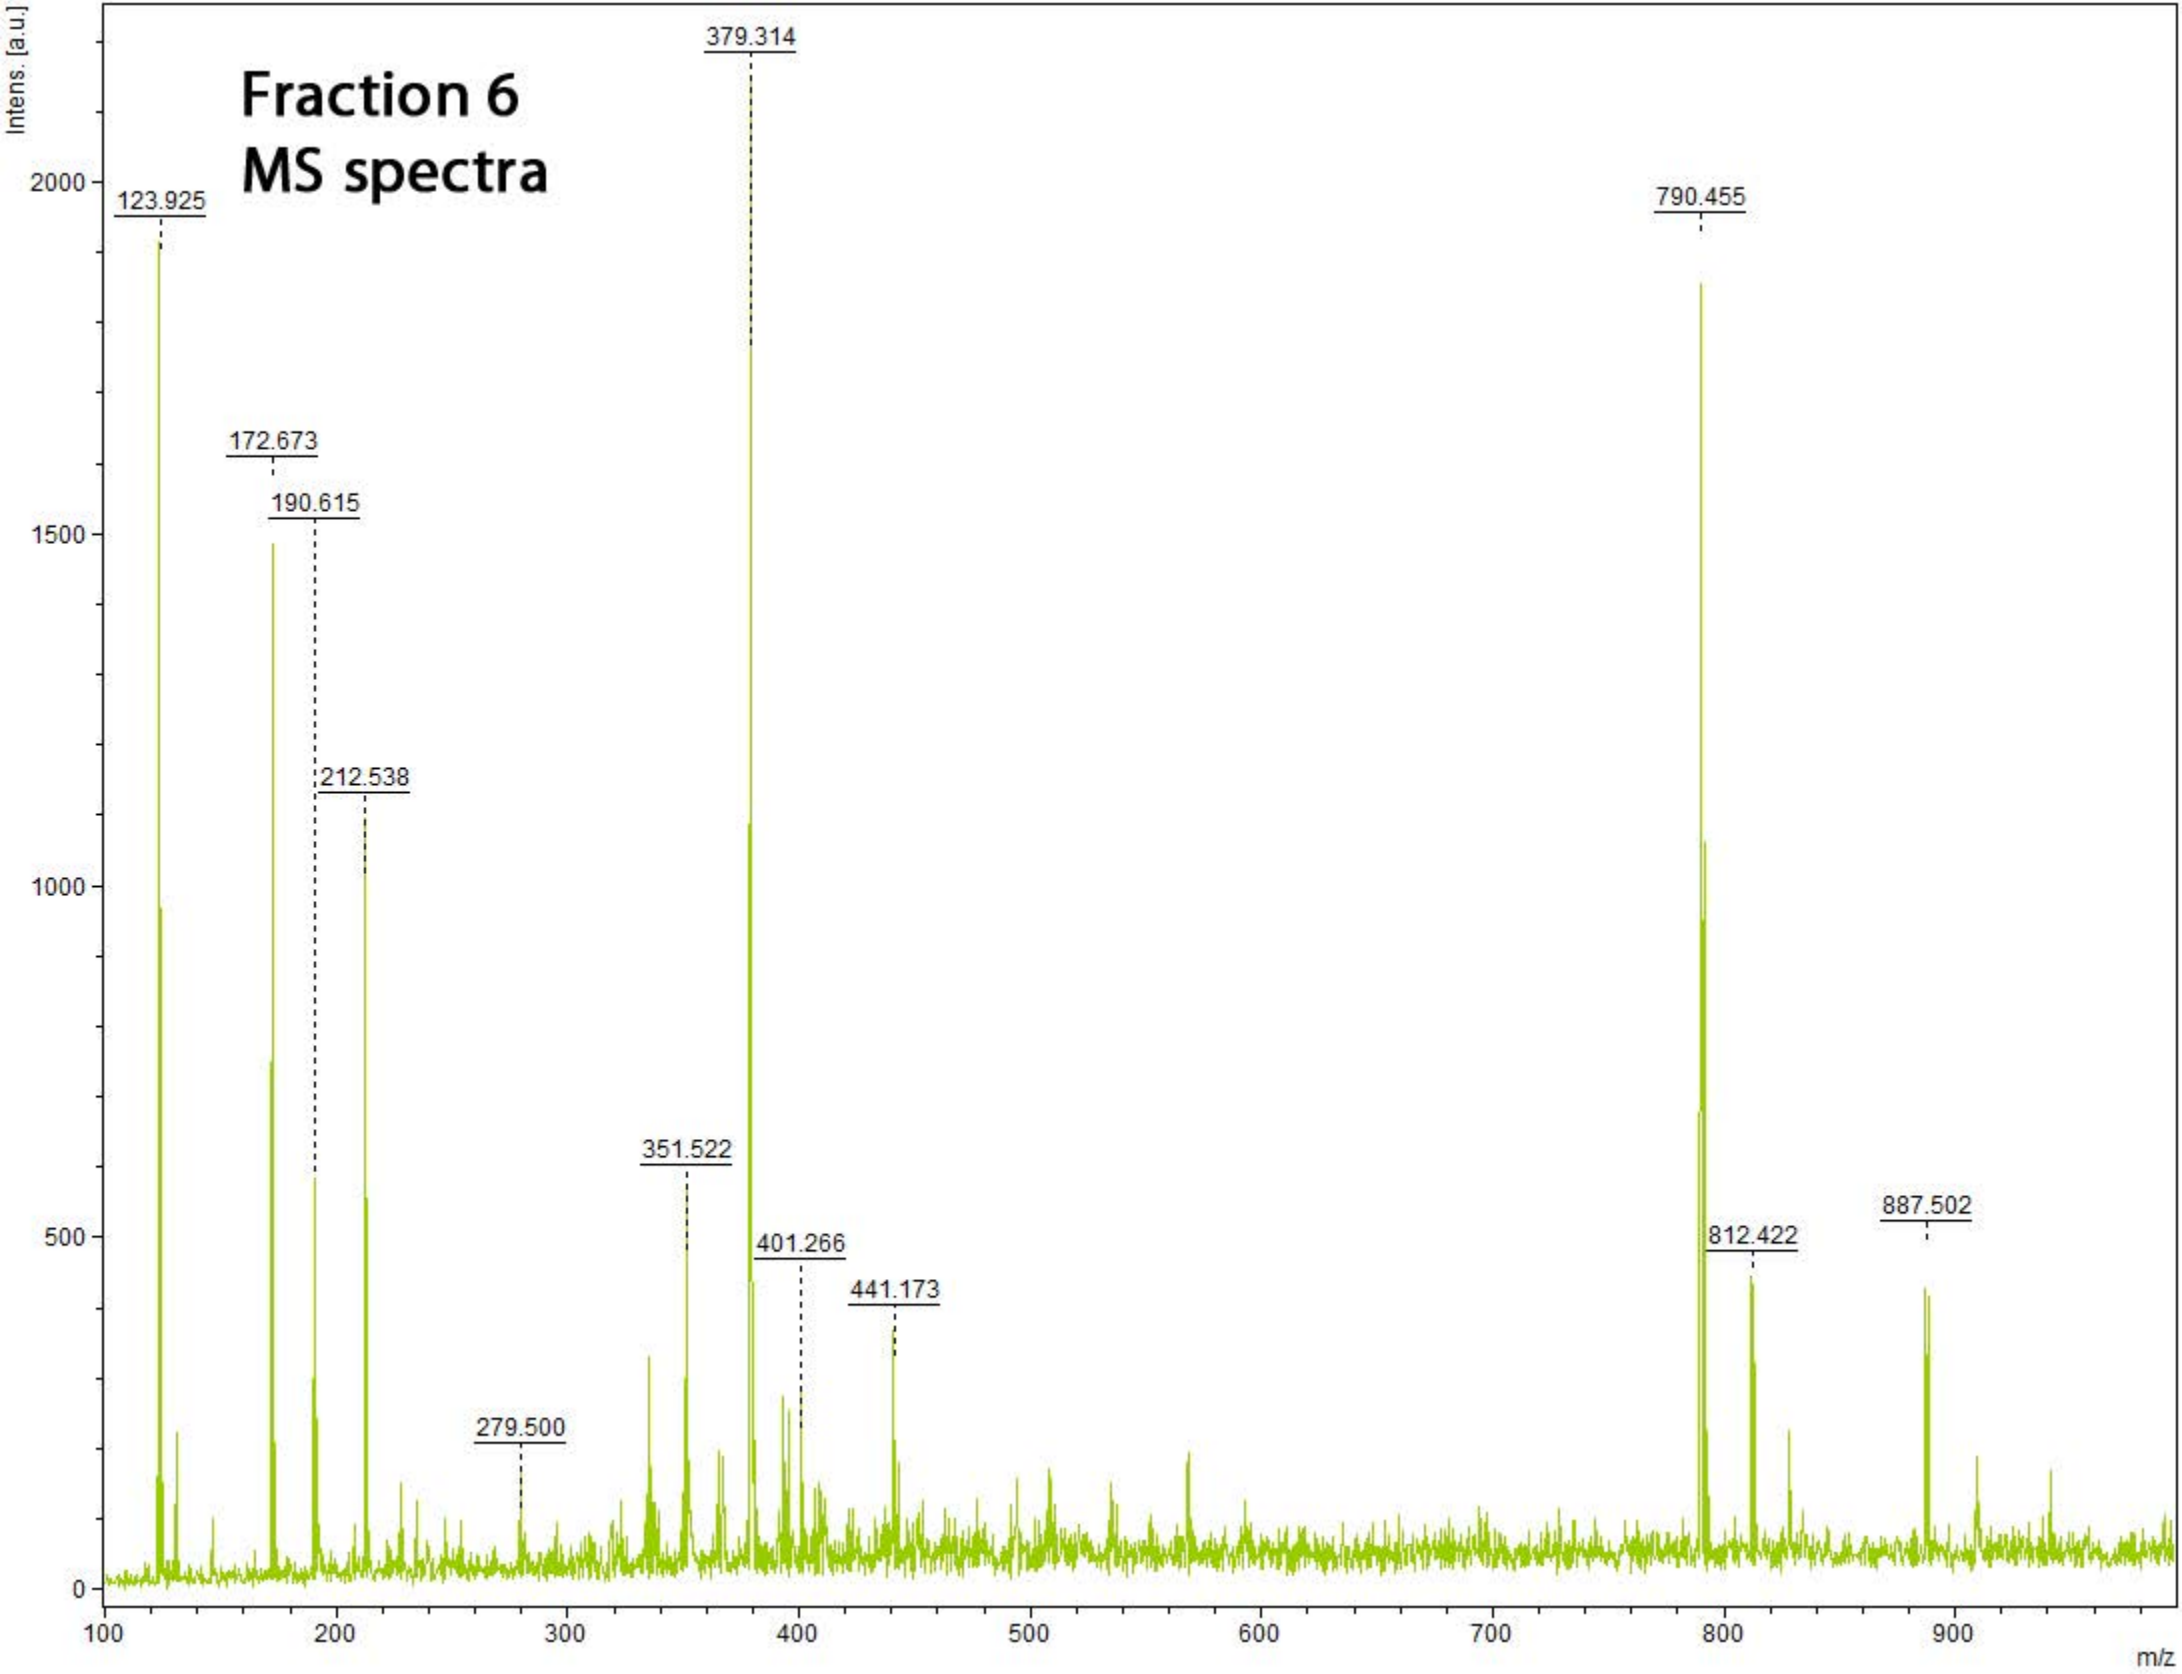

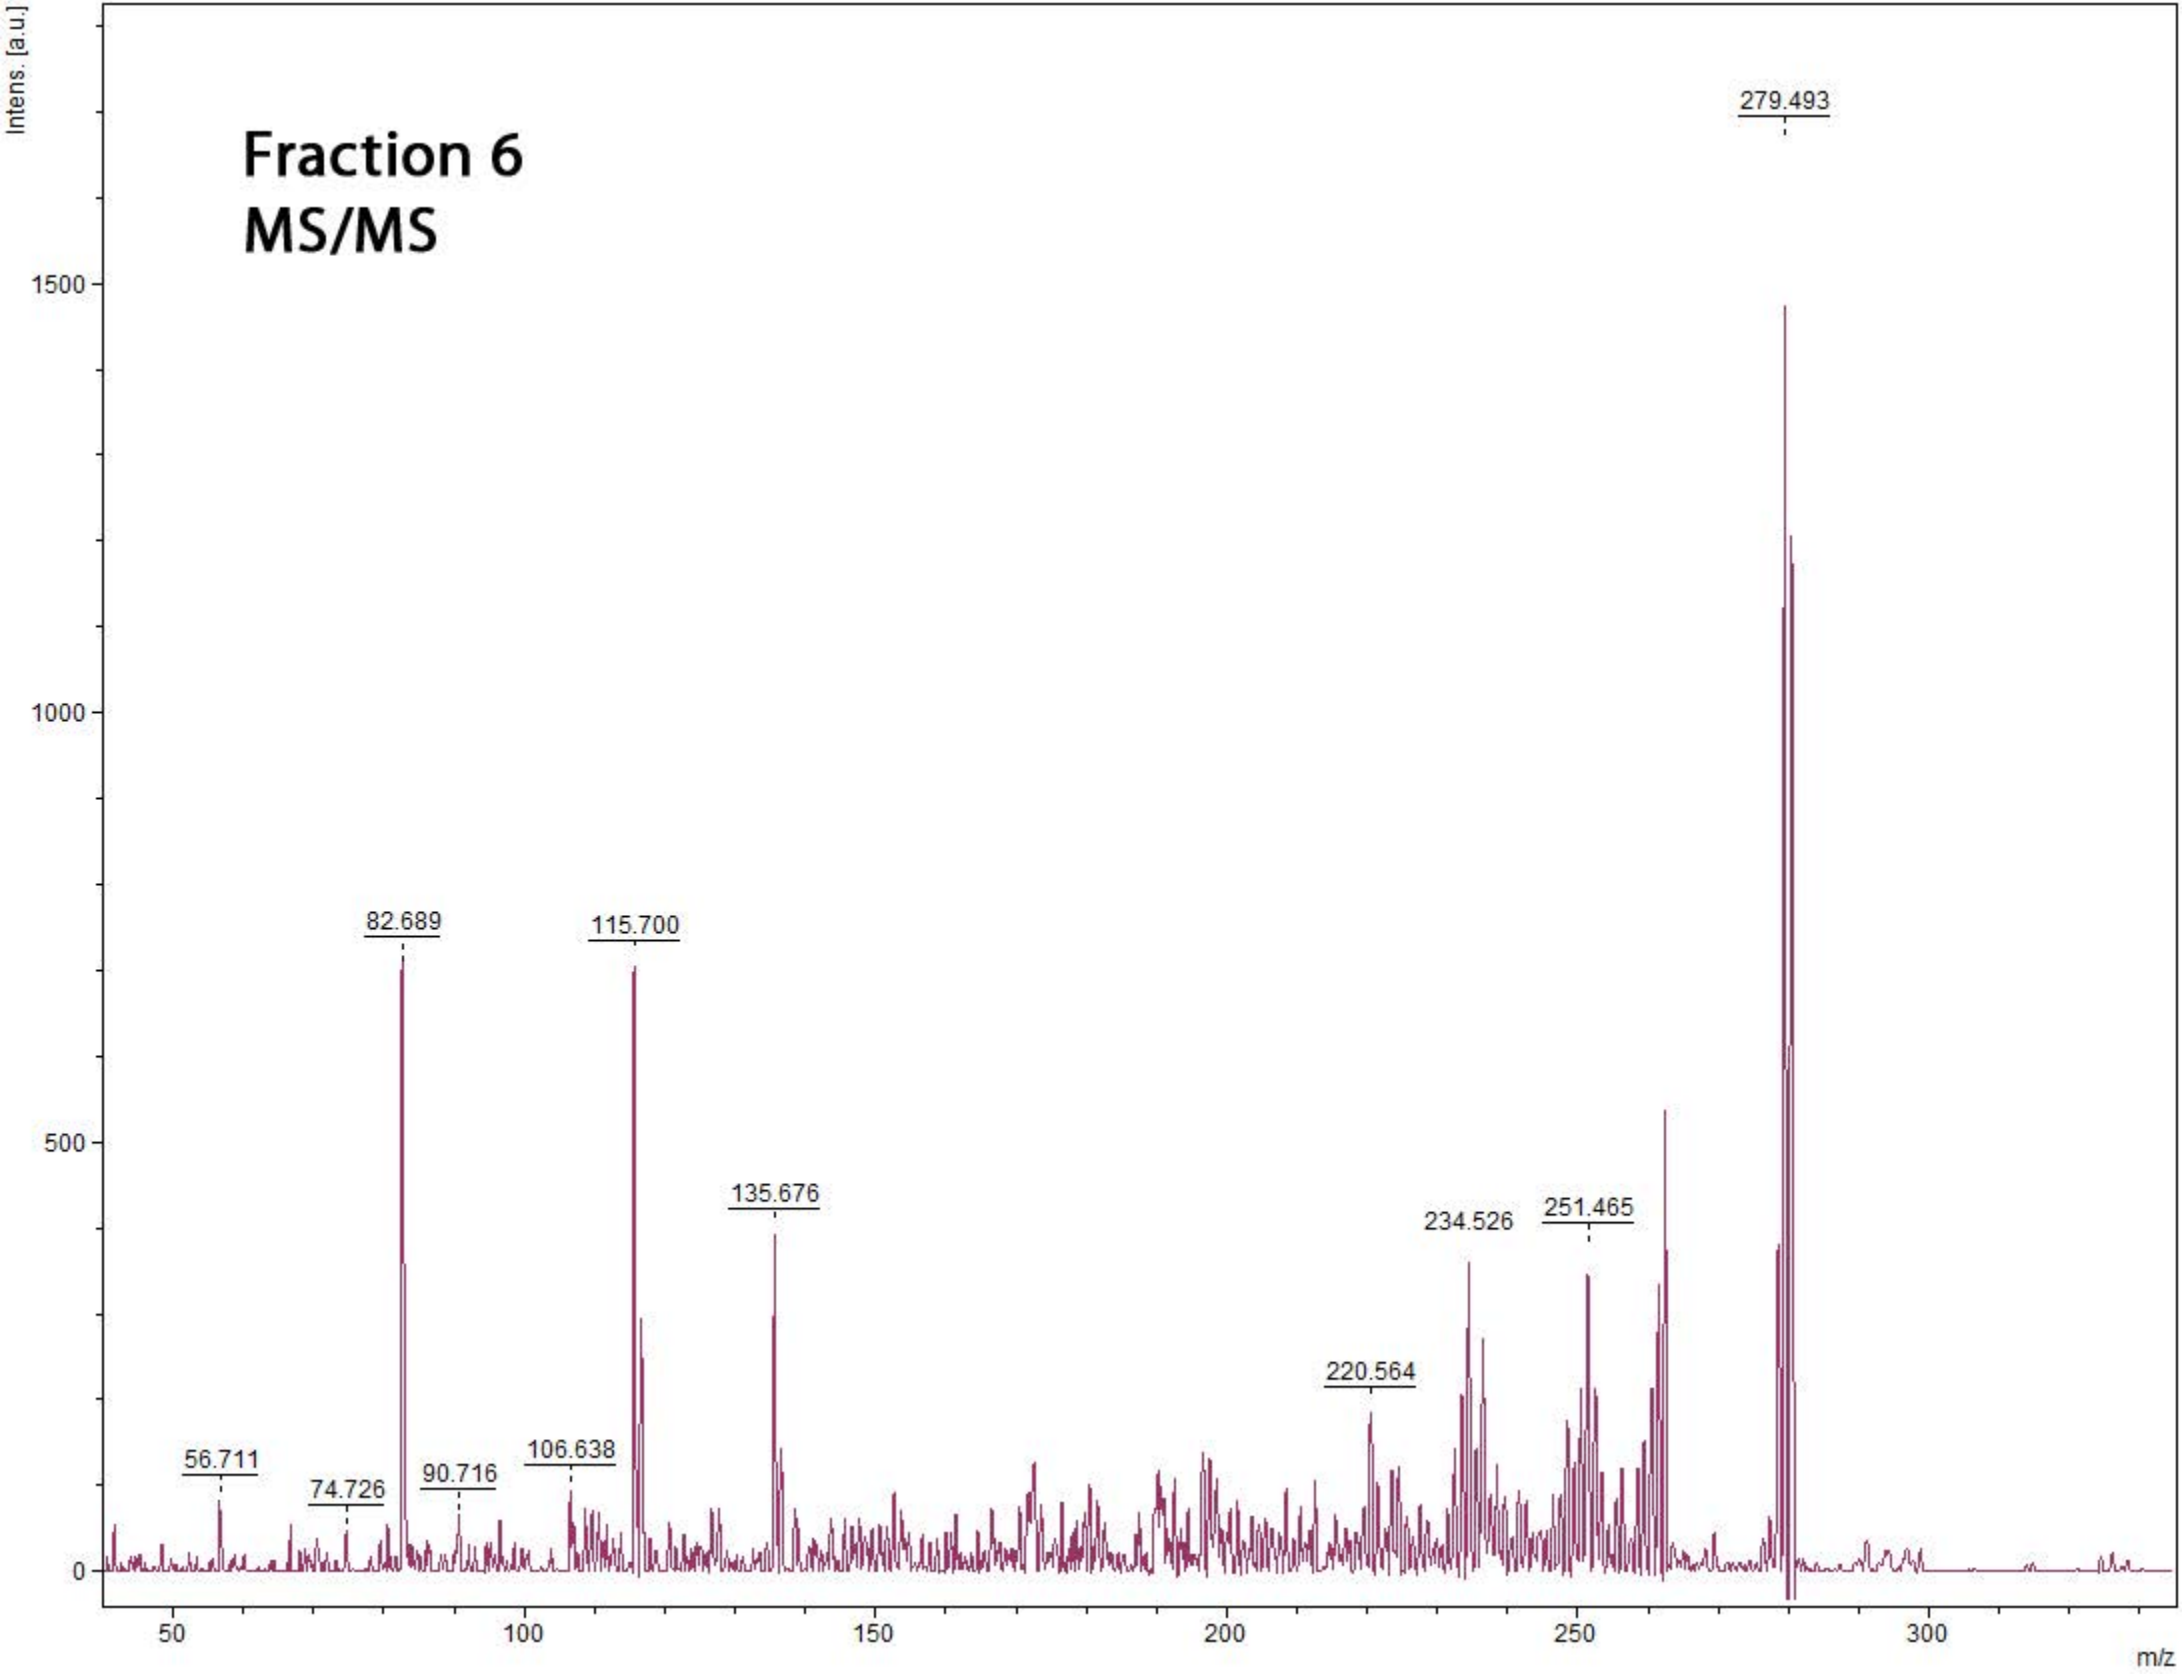

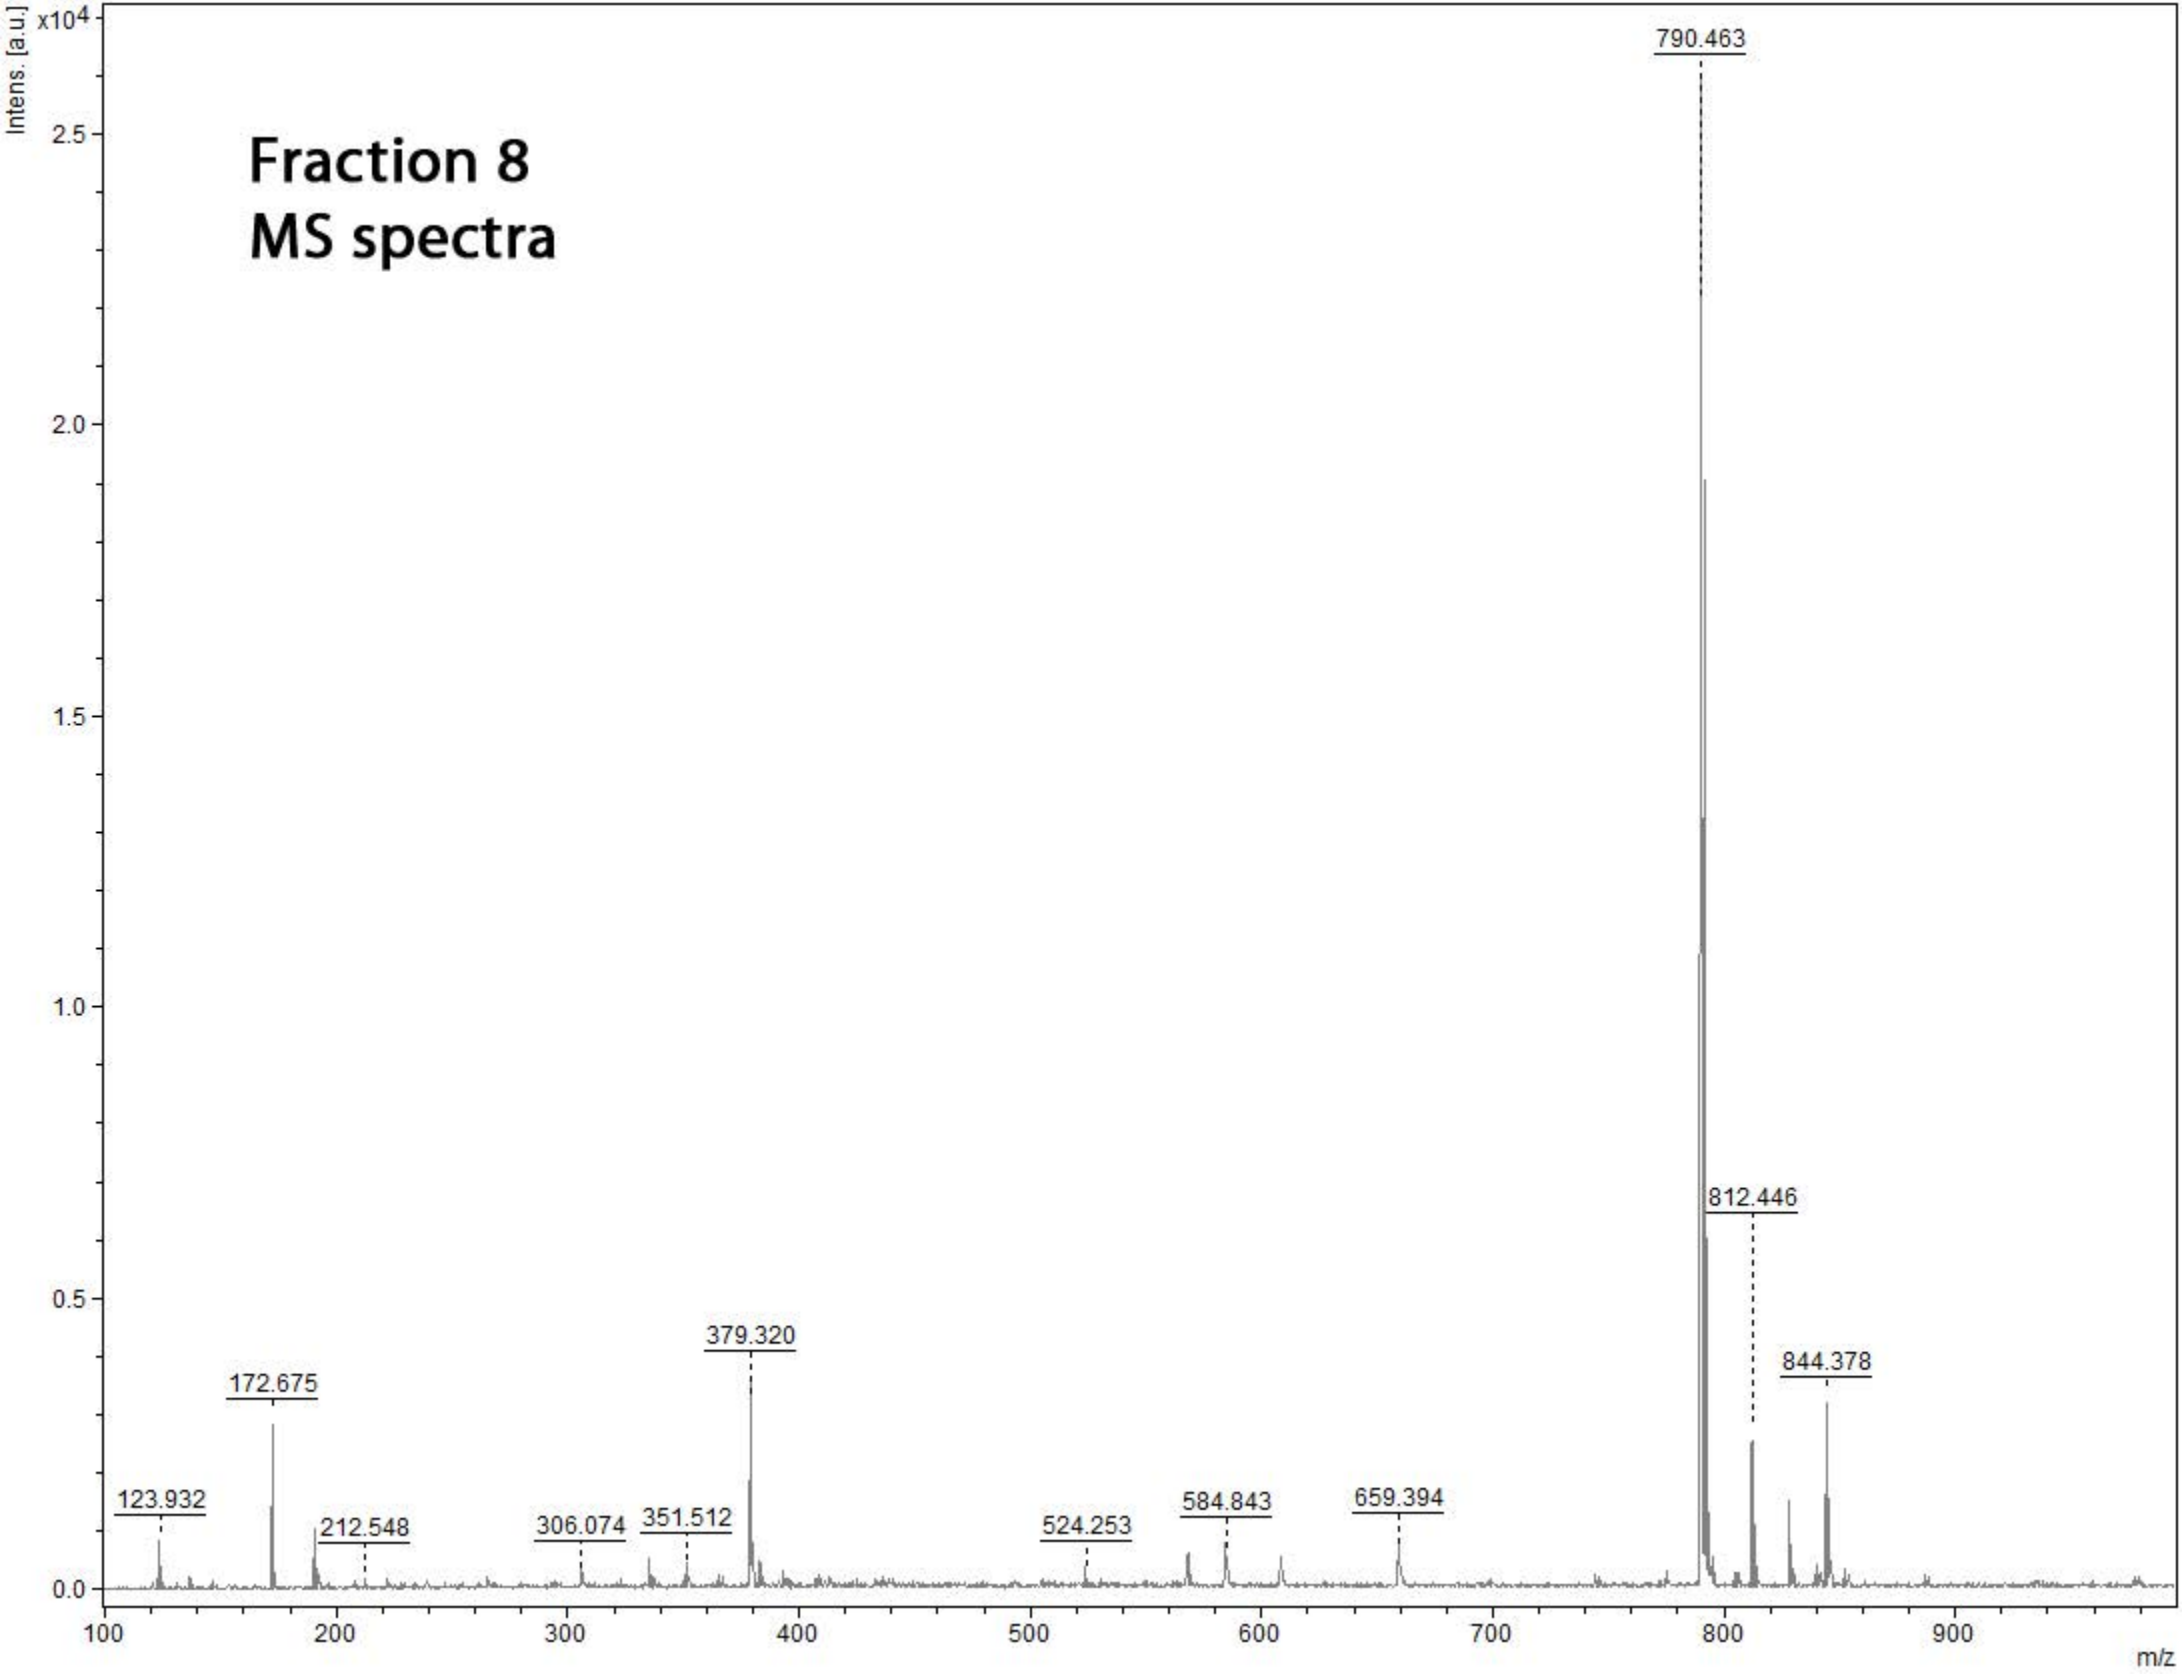

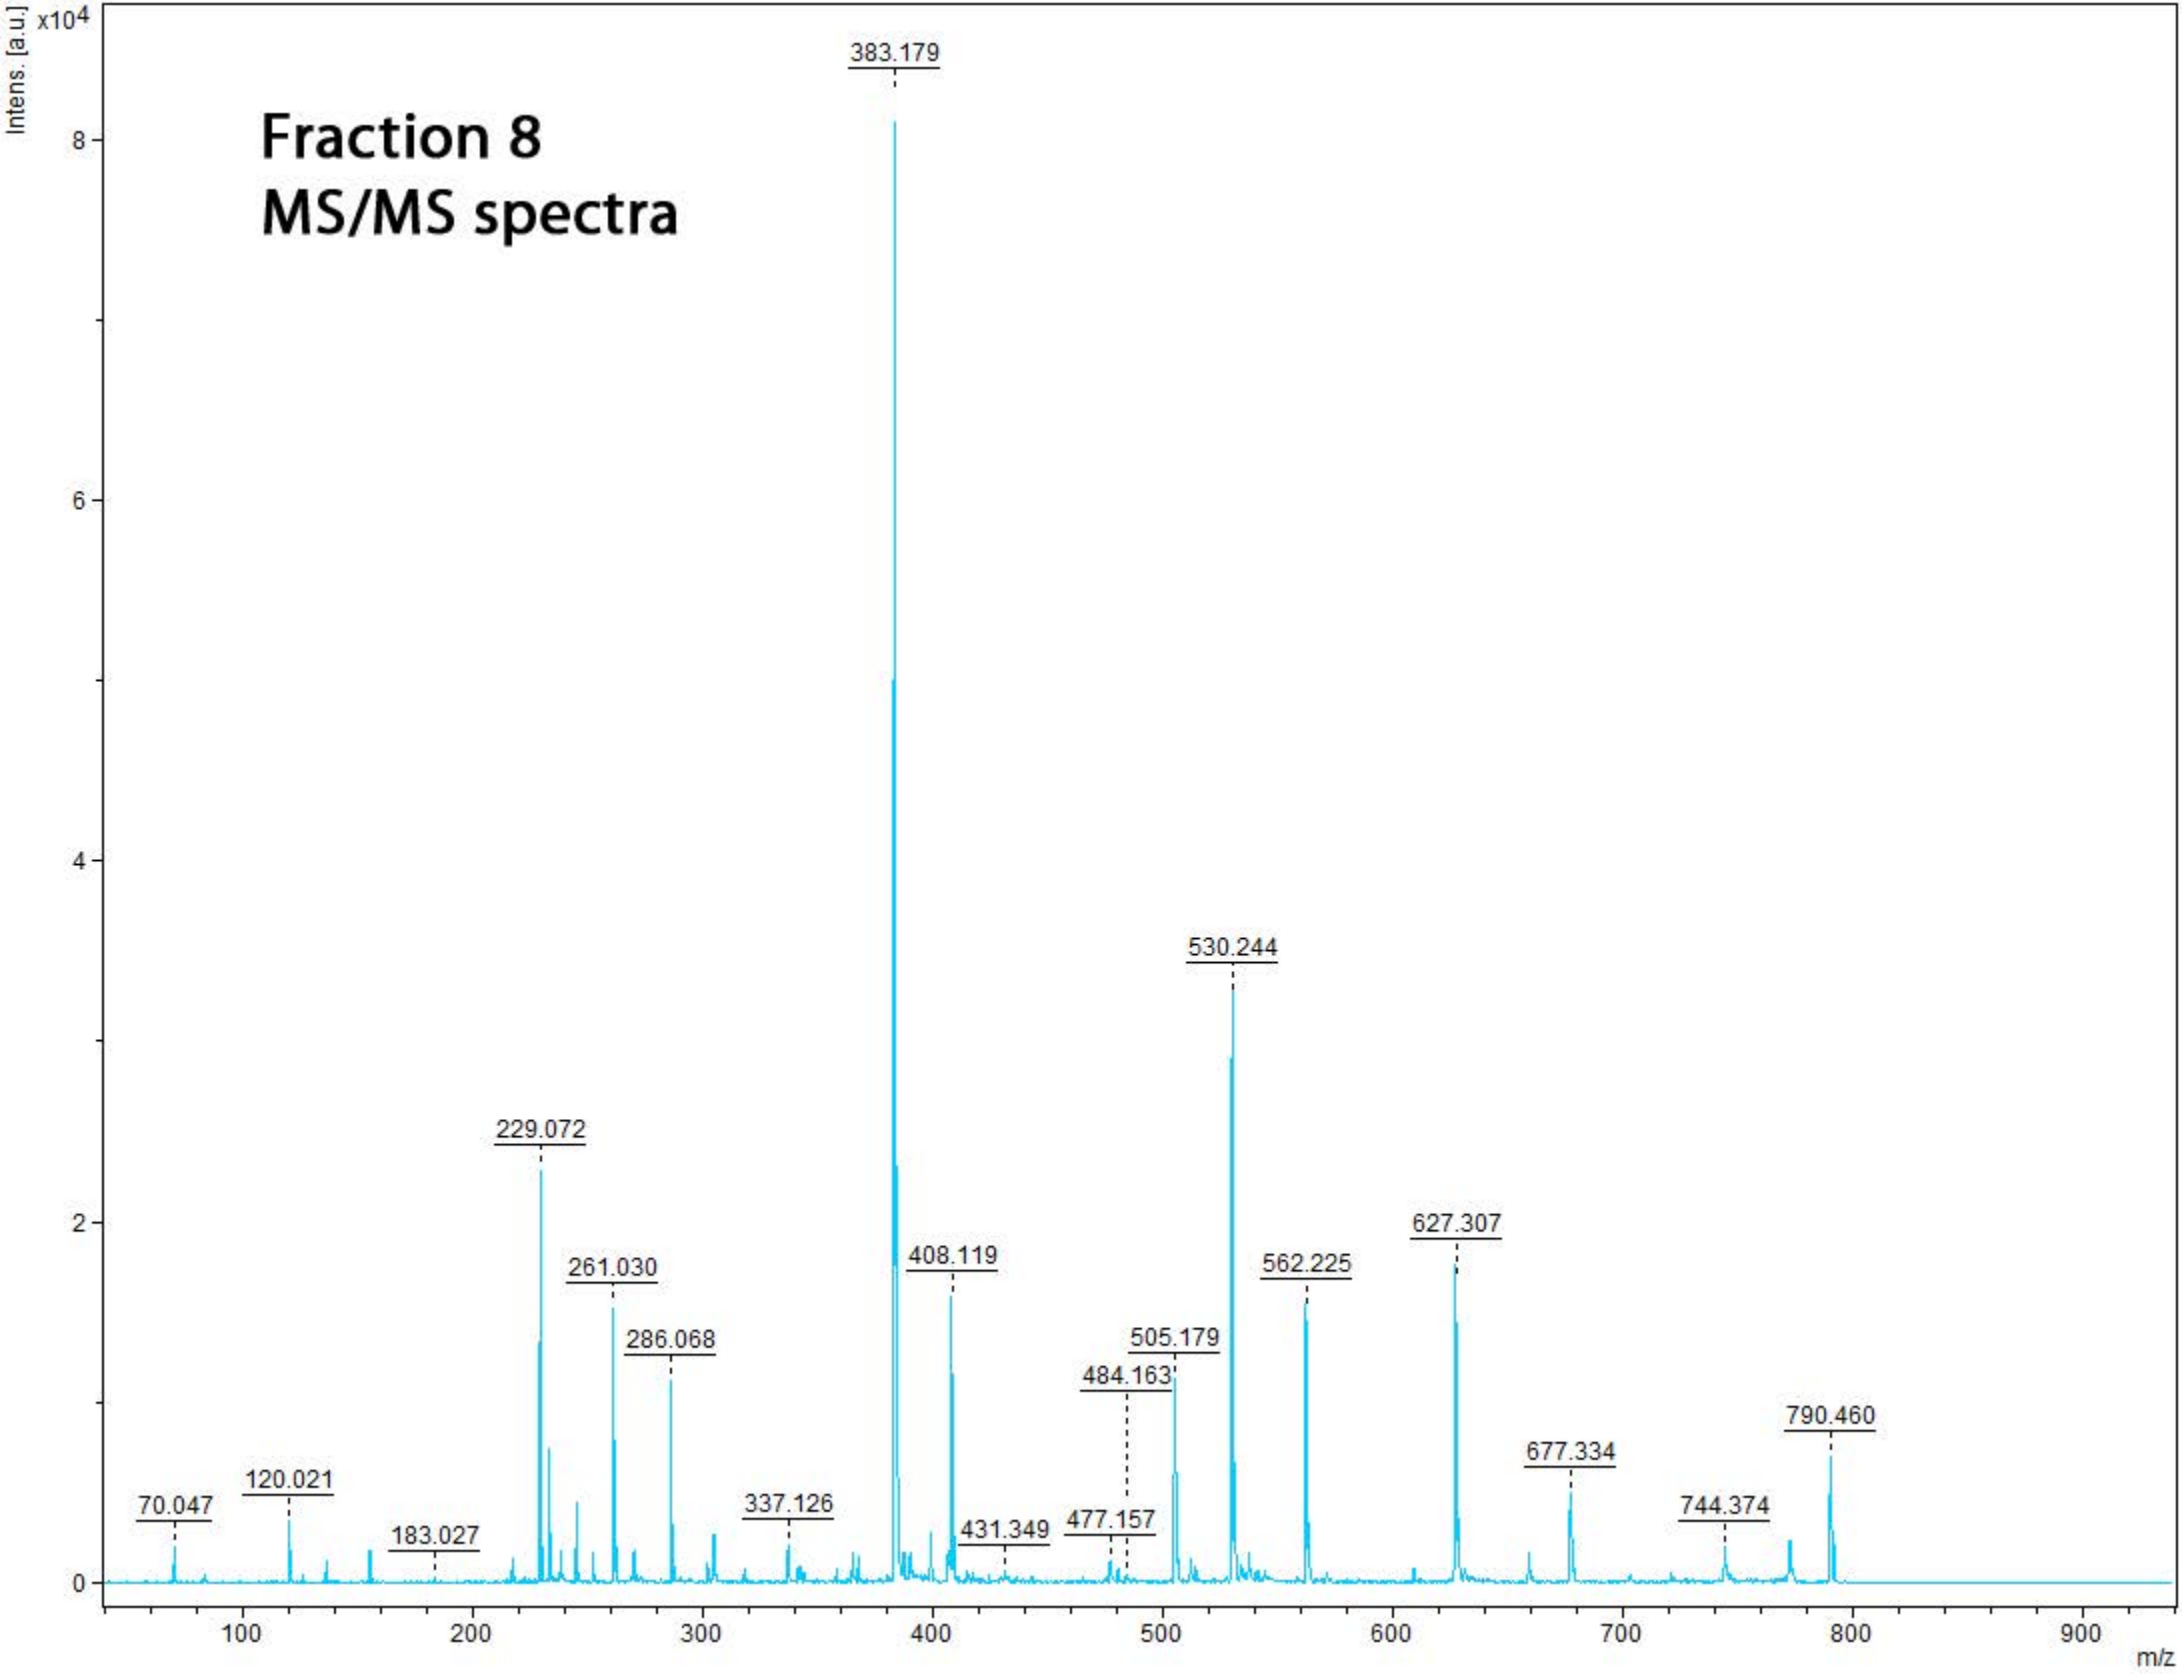

Supplement: c4fo00164h1.pdf [file c4fo00164h1.pdf]
